# Supplementary material
Source: ML conference proceedings conference paper supplement (https://openreview.net/forum?id=JtIqG47DAQ)
Supplement: supplementary_material [file attachment]

---

# Penalising the biases in norm regularisation enforces sparsity

---

Anonymous Author(s)

Affiliation

Address

email

## Abstract

Controlling the parameters' norm often yields good generalisation when training neural networks. Beyond simple intuitions, the relation between regularising parameters' norm and obtained estimators remains theoretically misunderstood. For one hidden ReLU layer networks with unidimensional data, this work shows the parameters' norm required to represent a function is given by the total variation of its second derivative, weighted by a  $\sqrt{1+x^2}$  factor. Notably, this weighting factor disappears when the norm of bias terms is not regularised. The presence of this additional weighting factor is of utmost significance as it is shown to enforce the uniqueness and sparsity (in the number of kinks) of the minimal norm interpolator. Conversely, omitting the bias' norm allows for non-sparse solutions. Penalising the bias terms in the regularisation, either explicitly or implicitly, thus leads to sparse estimators.

## 1 Introduction

Although modern neural networks are not particularly limited in terms of their number of parameters, they still demonstrate remarkable generalisation capabilities when applied to real-world data [Belkin et al., 2019, Zhang et al., 2021]. Intriguingly, both theoretical and empirical studies have indicated that the crucial factor determining the network's generalisation properties is not the sheer number of parameters, but rather the norm of these parameters [Bartlett, 1996, Neyshabur et al., 2014]. This norm is typically controlled through a combination of explicit regularisation techniques, such as weight decay [Krogh and Hertz, 1991], and some form of implicit regularisation resulting from the training algorithm employed [Soudry et al., 2018, Lyu and Li, 2019, Ji and Telgarsky, 2019, Chizat and Bach, 2020].

Neural networks with a large number of parameters can approximate any continuous function on a compact set [Barron, 1993]. Thus, without norm control, the space of estimated functions encompasses all continuous functions. In the parameter space, this implies considering neural networks with infinite width and unbounded weights [Neyshabur et al., 2014]. Yet, when weight control is enforced, the exact correspondence between the parameter space (i.e., the parameters  $\theta$  of the network) and the function space (i.e., the estimated function  $f_\theta$  produced by the network's output) becomes unclear. Establishing this correspondence is pivotal for comprehending the generalisation of overparameterised neural networks. Two fundamental questions arise.

**Question 1.** *What quantity in the function space, does the parameters' norm of a neural network correspond to?*

**Question 2.** *What functions are learnt when fitting training data with minimal parameters' norm?*

We study these questions in the context of a one-hidden ReLU layer network with a skip connection. Previous research [Kurková and Sanguineti, 2001, Bach, 2017] has examined generalisation guarantees for small representational cost functions, where the representational cost refers to the

norm required to parameterise the function. However, it remains challenging to interpret this representational cost using classical analysis tools and identify the corresponding function space. To address this issue, Question 1 seeks to determine whether this representational cost can be translated into a more interpretable functional (pseudo) norm. Note that Question 1 studies the parameters' norm required to fit a function on an entire domain. In contrast, when training a neural network for a regression task, we only fit a finite number of points given by the training data. Question 2 arises to investigate the properties of the learned functions when minimising some empirical loss with a regularisation of the parameters' norm regardless of whether it is done explicitly or implicitly.

In relation to our work, Savarese et al. [2019], Ongie et al. [2019] address Question 1 for one-hidden layer ReLU neural networks, focusing on univariate and multivariate functions, respectively. For a comprehensive review of this line of work, we recommend consulting the survey of Parhi and Nowak [2023]. On the other hand, Parhi and Nowak [2021], Debarre et al. [2022], Stewart et al. [2022] investigate Question 2 specifically in the univariate case. Additionally, Sanford et al. [2022] examine a particular multidimensional case. However, all of these existing studies overlook the bias parameters of the neural network when considering the  $\ell_2$  regularisation term. By omitting the biases, the analysis and solutions to these questions become simpler.

In sharp contrast, our work addresses both Questions 1 and 2 for univariate functions *while also incorporating regularisation of the bias parameters*. It may appear as a minor detail—it is commonly believed that similar estimators are obtained whether or not the biases' norm<sup>1</sup> is penalised [see e.g. Ng, 2011]. Nonetheless, our research demonstrates that penalising the bias terms enforce sparsity and uniqueness of the estimated function, which is not achieved without including the bias regularisation. The practical similarity between these two explicit regularisations can be attributed to the presence of implicit regularisation, which considers the bias terms as well. The updates performed by first-order optimisation methods do not distinguish between bias and weight parameters, suggesting that they are subject to the same implicit regularisation. Consequently, while both regularisation approaches may yield similar estimators in practical settings, we contend that the theoretical estimators obtained with bias term regularisation capture the observed implicit regularisation effect. Hence, it is essential to investigate the implications of penalising the bias terms when addressing Questions 1 and 2, as the answers obtained in this scenario significantly differ from those without bias penalisation.

**Contributions.** After introducing the setting in Section 2, we address Question 1 in Section 3 using a similar analysis approach as Savarese et al. [2019]. The key result, Theorem 1, establishes that the representational cost of a function, when allowed a *free* skip connection, is given by the weighted total variation of its second derivative, incorporating a  $\sqrt{1+x^2}$  term. Notably, penalising the bias terms introduces a  $\sqrt{1+x^2}$  multiplicative weight in the total variation, contrasting with the absence of bias penalisation.

This weighting fundamentally impacts the answer to Question 2. In particular, it breaks the shift invariance property of the function's representational cost, rendering the analysis technique proposed by Debarre et al. [2022] inadequate. To address this issue, we delve in Sections 4 and 5 into the computation and properties of solutions to the optimisation problem:

$$\inf_f \left\| \sqrt{1+x^2} f'' \right\|_{TV} \quad \text{subject to } \forall i \in [n], f(x_i) = y_i.$$

In Section 4, we reformulate this problem as a continuous dynamic program, enabling a simpler analysis of the minimisation problem. Leveraging this dynamic program reformulation, Section 5 establishes the uniqueness of the solution. Additionally, under certain data assumptions, we demonstrate that the minimiser is among the sparsest interpolators in terms of the number of kinks. It is worth noting that similar results have been studied in the context of sparse spikes deconvolution [Candès and Fernandez-Granda, 2014, Fernandez-Granda, 2016, Poon et al., 2019], and our problem can be seen as a generalisation of basis pursuit [Chen et al., 2001] to infinite-dimensional parameter spaces. However, classical techniques for sparse spikes deconvolution are ill-suited for addressing Question 2, as the set of sparsest interpolators is infinite in our setting.

Finally, the significance of bias term regularisation in achieving sparser estimators during neural network training is illustrated on toy examples in Section 6. To ensure conciseness, only proof sketches are presented in the main paper, while the complete proofs can be found in the Appendix.

<sup>1</sup>Even though Goodfellow et al. [2016, Chapter 7] claim that penalising the biases might lead to underfitting, our work does not focus on the optimisation aspect and assumes interpolation occurs.

## 88 2 Infinite width networks

89 This section introduces the considered setting, representing unidimensional functions as infinite width  
 90 networks. Some precise mathematical arguments are omitted here, since this construction follows  
 91 directly the lines of Savarese et al. [2019], Ongie et al. [2019]. This work considers unidimensional  
 92 functions  $f_\theta : \mathbb{R} \rightarrow \mathbb{R}$  parameterised by a one hidden layer neural networks with ReLU activation as

$$f_\theta(x) = \sum_{j=1}^m a_j \sigma(w_j x + b_j),$$

93 where  $\sigma(z) = \max(0, z)$  is the ReLU activation and  $\theta = (a_j, w_j, b_j)_{j \in [m]} \in \mathbb{R}^{3m}$  are the parameters  
 94 defining the neural network. The vector  $\mathbf{a} = (a_j)_{j \in [m]}$  stands for the weights of the last layer,  
 95 while  $\mathbf{w}$  and  $\mathbf{b}$  respectively stand for the weights and biases of the hidden layer. For any width  $m$   
 96 and parameters  $\theta$ , the quantity of importance is the squared Euclidean norm of the parameters:  
 97  $\|\theta\|_2^2 = \sum_{j=1}^m a_j^2 + w_j^2 + b_j^2$ .

98 We recall that contrary to Savarese et al. [2019], Ongie et al. [2019], the bias terms are included in  
 99 the considered norm here. We now define the representational cost of a function  $f : \mathbb{R} \rightarrow \mathbb{R}$  as

$$R(f) = \inf_{\substack{m \in \mathbb{N} \\ \theta \in \mathbb{R}^{3m}}} \frac{1}{2} \|\theta\|_2^2 \quad \text{such that} \quad f_\theta = f.$$

100 By homogeneity of the parameterisation, a typical rescaling trick [see e.g. Neyshabur et al., 2014,  
 101 Theorem 1] allows to rewrite

$$R(f) = \inf_{m, \theta \in \mathbb{R}^{3m}} \|\mathbf{a}\|_1 \quad \text{such that} \quad f_\theta = f \text{ and } w_j^2 + b_j^2 = 1 \text{ for any } j \in [m].$$

102 Note that  $R(f)$  is only finite when the function  $f$  is exactly described as a finite width neural network.  
 103 We aim at extending this definition to a much larger functional space, i.e. to any function that can be  
 104 arbitrarily well approximated by finite width networks, while keeping a (uniformly) bounded norm of  
 105 the parameters. Despite approximating the function with finite width networks, the width necessarily  
 106 grows to infinity when the approximation error goes to 0. Similarly to Ongie et al. [2019], define

$$\bar{R}(f) = \lim_{\varepsilon \rightarrow 0^+} \left( \inf_{m, \theta \in \mathbb{R}^{3m}} \frac{1}{2} \|\theta\|_2^2 \quad \text{such that} \quad |f_\theta(x) - f(x)| \leq \varepsilon \text{ for any } x \in [-1/\varepsilon, 1/\varepsilon] \right).$$

107 Note that the approximation has to be restricted to the compact set  $[-1/\varepsilon, 1/\varepsilon]$  to avoid problematic  
 108 degenerate situations. The functional space for which  $\bar{R}(f)$  is finite is much larger than for  $R$ , and in-  
 109 cludes every compactly supported Lipschitz function, while coinciding with  $R$  when the latter is finite.

110 By rescaling argument again, we can assume the hidden layer parameters  $(w_j, b_j)$  are in  $\mathbb{S}_1$  and  
 111 instead consider the  $\ell_1$  norm of the output layer weights. The parameters of a network can then be  
 112 seen as a discrete signed measure on the unit sphere  $\mathbb{S}_1$ . When the width goes to infinity, a limit is  
 113 then properly defined and corresponds to a possibly continuous signed measure. Mathematically,  
 114 define  $\mathcal{M}(\mathbb{S}_1)$  the space of signed measures  $\mu$  on  $\mathbb{S}_1$  with finite total variation  $\|\mu\|_{\text{TV}}$ . Following the  
 115 typical construction of Bengio et al. [2005], Bach [2017], an infinite width network is parameterised  
 116 by a measure  $\mu \in \mathcal{M}(\mathbb{S}_1)$  as<sup>2</sup>

$$f_\mu : x \mapsto \int_{\mathbb{S}_1} \sigma(wx + b) d\mu(w, b).$$

117 Similarly to Ongie et al. [2019],  $\bar{R}(f)$  verifies the equality

$$\bar{R}(f) = \inf_{\mu \in \mathcal{M}(\mathbb{S}_1)} \|\mu\|_{\text{TV}} \quad \text{such that} \quad f = f_\mu.$$

118 The right term defines the  $\mathcal{F}_1$  norm [Kurková and Sanguinetti, 2001], i.e.  $\bar{R}(f) = \|f\|_{\mathcal{F}_1}$ . The  $\mathcal{F}_1$   
 119 norm is intuited to be of major significance for the empirical success of neural networks. In particular,  
 120 generalisation properties of small  $\mathcal{F}_1$  norm estimators are derived by Kurková and Sanguinetti [2001],  
 121 Bach [2017], while many theoretical results support the conjecture that training one hidden layer  
 122 neural networks with gradient descent yields an implicit regularisation on the  $\mathcal{F}_1$  norm of the  
 123 estimator [Lyu and Li, 2019, Ji and Telgarsky, 2019, Chizat and Bach, 2020, Boursier et al., 2022].  
 124 The significance of the  $\mathcal{F}_1$  norm is the main motivation of this paper. While previous works also  
 125 studied the representational costs of functions by neural networks [Savarese et al., 2019, Ongie et al.,  
 126 2019], they did not penalise the bias term in the parameters' norm, studying a functional norm slightly

<sup>2</sup>By abuse of notation, we write both  $f_\theta$  and  $f_\mu$ , as it is clear from context whether the subscript is a vector or a measure.

127 differing from the  $\mathcal{F}_1$  norm. This subtlety is at the origin of different levels of sparsity between the  
 128 obtained estimators with or without penalising the bias terms, as discussed in Sections 5 and 6.

## 129 2.1 Unpenalised skip connection

130 Our objective is now to characterise the  $\mathcal{F}_1$  norm of unidimensional functions and minimal norm  
 131 interpolators, which can be approximately obtained when training a neural network with norm  
 132 regularisation. The analysis and result yet remain complex despite the unidimensional setting.  
 133 Allowing for an unpenalised affine term in the neural network representation leads to a cleaner  
 134 characterisation of the norm and description of minimal norm interpolators. As a consequence, we  
 135 parameterise in the remaining of this work finite and infinite width networks as follows:

$$f_{\theta, a_0, b_0} : x \mapsto a_0 x + b_0 + f_{\theta}(x), \quad \text{and} \quad f_{\mu, a_0, b_0} : x \mapsto a_0 x + b_0 + f_{\mu}(x),$$

136 where  $(a_0, b_0) \in \mathbb{R}^2$ . The affine part  $a_0 x + b_0$  actually corresponds to a *free* skip connection in the  
 137 neural network architecture [He et al., 2016] and allows to ignore the affine part in the representational  
 138 cost of the function  $f$ , which we now define as

$$\bar{R}_1(f) = \lim_{\varepsilon \rightarrow 0^+} \left( \inf_{\substack{m, \theta \in \mathbb{R}^{3m} \\ (a_0, b_0) \in \mathbb{R}^2}} \frac{1}{2} \|\theta\|_2^2 \quad \text{such that} \quad |f_{\theta, a_0, b_0}(x) - f(x)| \leq \varepsilon \text{ for any } x \in [-1/\varepsilon, 1/\varepsilon] \right).$$

139 The representational cost  $\bar{R}_1(f)$  is similar to  $\bar{R}(f)$ , but allows for a *free* affine term in the network  
 140 architecture. Similarly to  $\bar{R}(f)$ , it can be proven that  $\bar{R}_1(f)$  verifies

$$\bar{R}_1(f) = \inf_{\substack{\mu \in \mathcal{M}(\mathbb{S}_1) \\ a_0, b_0 \in \mathbb{R}}} \|\mu\|_{\text{TV}} \quad \text{such that} \quad f = f_{\mu, a_0, b_0}.$$

141 The remaining of this work studies more closely the cost  $\bar{R}_1(f)$ . Theorem 1 in Section 3 can be  
 142 directly extended to the cost  $\bar{R}(f)$ , i.e. without unpenalised skip connection. Its adapted version is  
 143 given by Theorem 4 in Appendix C for completeness.

144 Multiple works also consider free skip connections as it allows for a simpler analysis [e.g. Savarese  
 145 et al., 2019, Ongie et al., 2019, Debarre et al., 2022, Sanford et al., 2022]. Since a skip connection  
 146 can be represented by two ReLU neurons, it is commonly believed that considering a free skip  
 147 connection does not alter the nature of the obtained results. This belief is further supported by  
 148 empirical evidence in Section 6 and Appendix B, where our findings hold true both with and without  
 149 free skip connections.

## 150 3 Representational cost

151 Theorem 1 below characterises the representational cost  $\bar{R}_1(f)$  of any univariate function.

152 **Theorem 1.** *For any Lipschitz function  $f : \mathbb{R} \rightarrow \mathbb{R}$ ,*

$$\bar{R}_1(f) = \left\| \sqrt{1 + x^2} f'' \right\|_{\text{TV}} = \int_{\mathbb{R}} \sqrt{1 + x^2} \, d|f''|(x).$$

153 *For any non-Lipschitz function,  $\bar{R}_1(f) = \infty$ .*

154 In Theorem 1,  $f''$  is the distributional second derivative of  $f$ , which is well defined for Lipschitz  
 155 functions. Without penalisation of the bias terms, the representational cost is given by the total  
 156 variation of  $f''$  [Savarese et al., 2019]. Theorem 1 states that penalising the biases adds a weight  
 157  $\sqrt{1 + x^2}$  to  $f''$ . This weighting favors sparser estimators when training neural networks, as shown in  
 158 Section 5. Also, the space of functions that can be represented by infinite width neural networks with  
 159 finite parameters' norm, when the bias terms are ignored, corresponds to functions with bounded  
 160 total variation of their second derivative. When including these bias terms in the representational  
 161 cost, second derivatives additionally require a *light tail*. Without a *free* affine term, Theorem 4 in  
 162 Appendix C characterises  $\bar{R}(f)$ , which yields an additional term accounting for the affine part of  $f$ .

163 According to Theorem 1, the minimisation problem considered when training one hidden ReLU layer  
 164 infinite width neural network with  $\ell_2$  regularisation is equivalent to the minimisation problem

$$\inf_f \sum_{i=1}^n (f(x_i) - y_i)^2 + \lambda \left\| \sqrt{1 + x^2} f'' \right\|_{\text{TV}}. \quad (1)$$

165 What types of functions do minimise this problem? Which solutions does the  $\|\sqrt{1+x^2}f''\|_{\text{TV}}$   
 166 regularisation term favor? These fundamental questions are studied in the following sections. We  
 167 show that this regularisation favors functions that can be represented by small (finite) width neural  
 168 networks. On the contrary, when the weight decay term does not penalise the biases of the neural  
 169 network, such a sparsity is not particularly preferred as highlighted by Section 6.

## 170 4 Computing minimal norm interpolator

171 To study the properties of solutions obtained by training data with either an implicit or explicit weight  
 172 decay regularisation, we consider the minimal norm interpolator problem

$$\inf_{\theta, a_0, b_0} \frac{1}{2} \|\theta\|_2^2 \quad \text{such that } \forall i \in [n], f_{\theta, a_0, b_0}(x_i) = y_i, \quad (2)$$

173 where  $(x_i, y_i)_{i \in [n]} \in \mathbb{R}^{2n}$  is a training set. Without loss of generality, we assume in the following  
 174 that the observations  $x_i$  are ordered, i.e.,  $x_1 < x_2 < \dots < x_n$ . Thanks to Theorem 1, this problem is  
 175 equivalent, when allowing infinite width networks, to

$$\inf_f \left\| \sqrt{1+x^2} f'' \right\|_{\text{TV}} \quad \text{such that } \forall i \in [n], f(x_i) = y_i. \quad (3)$$

176 Lemma 1 below actually makes these problems equivalent as soon as the width is larger than some  
 177 threshold smaller than  $n - 1$ . Equation (3) then corresponds to Equation (1) when the regularisation  
 178 parameter  $\lambda$  is infinitely small.

179 **Lemma 1.** *The problem in Equation (3) admits a minimiser. Moreover, with  $i_0 := \min\{i \in [n] | x_i \geq$   
 180  $0\}$ , any minimiser is of the form*

$$f(x) = ax + b + \sum_{i=1}^{n-1} a_i (x - \tau_i)_+$$

181 where  $\tau_i \in (x_i, x_{i+1}]$  for any  $i \in \{1, \dots, i_0 - 2\}$ ,  $\tau_{i_0-1} \in (x_{i_0-1}, x_{i_0})$  and  $\tau_i \in [x_i, x_{i+1})$  for any  
 182  $i \in \{i_0, \dots, n-1\}$ .

183 Lemma 1 already provides a first guarantee on the sparsity of any minimiser of Equation (3). It  
 184 indeed includes at most  $n - 1$  kinks. In contrast, minimal norm interpolators with an infinite number  
 185 of kinks exist when the bias terms are not regularised [Debarre et al., 2022]. An even stronger sparse  
 186 recovery result is given in Section 5. Lemma 1 can be seen as a particular case of Theorem 1 of Wang  
 187 et al. [2021]. In the multivariate case and without a free skip connection, the latter states that the  
 188 minimal norm interpolator has at most one kink (i.e. neuron) per *activation cone* of the weights and  
 189 has no more than  $n + 1$  kinks in total. The idea of our proof is that several kinks among a single  
 190 activation cone could be merged into a single kink in the same cone. The resulting function then still  
 191 interpolates, but has a smaller representational cost.

192 Lemma 1 allows to only consider 2 parameters for each interval  $(x_i, x_{i+1})$  (potentially closed at one  
 193 end). Actually, the degree of freedom is only 1 on such intervals: choosing  $a_i$  fixes  $\tau_i$  (or inversely)  
 194 because of the interpolation constraint. Lemma 2 below uses this idea to recast the minimisation  
 195 Problem (3) as a dynamic program with unidimensional state variables  $s_i \in \mathbb{R}$  for any  $i \in [n]$ .

196 **Lemma 2.** *If  $x_1 < 0$  and  $x_n \geq 0$ , then we have for  $i_0 = \min\{i \in [n] | x_i \geq 0\}$  the following  
 197 equivalence of optimisation problems*

$$\min_{\substack{f \\ \forall i \in [n], f(x_i) = y_i}} \left\| \sqrt{1+x^2} f'' \right\|_{\text{TV}} = \min_{(s_{i_0-1}, s_{i_0}) \in \Lambda} g_{i_0}(s_{i_0}, s_{i_0-1}) + c_{i_0-1}(s_{i_0-1}) + c_{i_0}(s_{i_0}) \quad (4)$$

198 where the set  $\Lambda$  and the functions  $g_i$  and  $c_i$  are defined in Equations (5) to (7) below.

199 Let us describe the dynamic program defining the functions  $c_i$ , which characterises the minimal norm  
 200 interpolator thanks to Lemma 2. First define for any  $i \in [n-1]$ , the slope  $\delta_i := \frac{y_{i+1} - y_i}{x_{i+1} - x_i}$ ; the function

$$g_{i+1}(s_{i+1}, s_i) := \sqrt{(x_{i+1}(s_{i+1} - \delta_i) - x_i(s_i - \delta_i))^2 + (s_{i+1} - s_i)^2} \quad \text{for any } (s_{i+1}, s_i) \in \mathbb{R}^2; \quad (5)$$

$$\text{and the intervals } S_i(s) := \begin{cases} (-\infty, \delta_i] & \text{if } s > \delta_i \\ \{\delta_i\} & \text{if } s = \delta_i \\ [\delta_i, +\infty) & \text{if } s < \delta_i \end{cases} \quad \text{for any } s \in \mathbb{R}.$$

201 The set  $\Lambda$  is then the union of three product spaces given by

$$\Lambda := (-\infty, \delta_{i_0-1}) \times (\delta_{i_0-1}, +\infty) \cup \{(\delta_{i_0-1}, \delta_{i_0-1})\} \cup (\delta_{i_0-1}, +\infty) \times (-\infty, \delta_{i_0-1}). \quad (6)$$

202 Finally, we define the functions  $c_i : \mathbb{R} \rightarrow \mathbb{R}_+$  recursively as  $c_1 = c_n \equiv 0$  and

$$\begin{aligned} c_{i+1} : s_{i+1} &\mapsto \min_{s_i \in S_i(s_{i+1})} g_{i+1}(s_{i+1}, s_i) + c_i(s_i) \quad \text{for any } i \in \{1, \dots, i_0 - 2\} \\ c_i : s_i &\mapsto \min_{s_{i+1} \in S_i(s_i)} g_{i+1}(s_{i+1}, s_i) + c_{i+1}(s_{i+1}) \quad \text{for any } i \in \{i_0, \dots, n-1\}. \end{aligned} \quad (7)$$

203 Equation (7) defines a dynamic program with a continuous state space. Intuitively for  $i \geq i_0$ , the  
 204 variable  $s_i$  accounts for the left derivative at the point  $x_i$ . The term  $g_{i+1}(s_{i+1}, s_i)$  is the minimal  
 205 cost (in neuron norm) for reaching the point  $(x_{i+1}, y_{i+1})$  with a slope  $s_{i+1}$ , knowing that the left  
 206 slope is  $s_i$  at the point  $(x_i, y_i)$ . Similarly, the interval  $S_i(s_i)$  gives the reachable slopes<sup>3</sup> at  $x_{i+1}$ ,  
 207 knowing the slope in  $x_i$  is  $s_i$ . Finally,  $c_i(s_i)$  holds for the minimal cost of fitting all the points  
 208  $(x_{i+1}, y_{i+1}), \dots, (x_n, y_n)$  when the left derivative in  $(x_i, y_i)$  is given by  $s_i$ . It is defined recursively  
 209 by minimising the sum of the cost for reaching the next point  $(x_{i+1}, y_{i+1})$  with a slope  $s_{i+1}$ , given by  
 210  $g_{i+1}(s_{i+1}, s_i)$ ; and the cost of fitting all the points after  $x_{i+1}$ , given by  $c_{i+1}$ . This recursive definition  
 is illustrated in Figure 1 below. A symmetric definition holds for  $i < i_0$ .

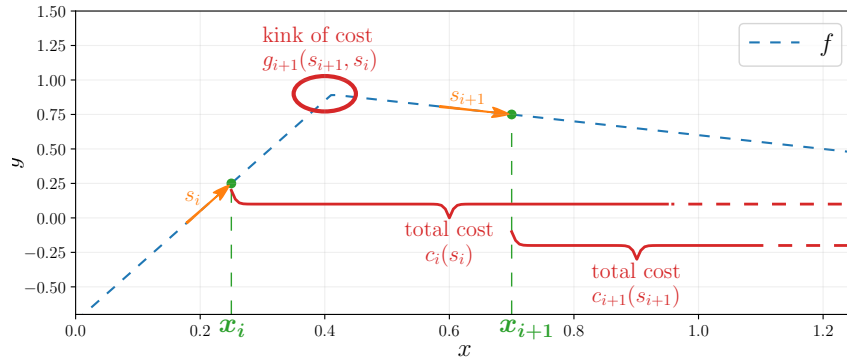

Figure 1: Recursive definition of the dynamic program for  $i \geq i_0$ .

211

212 **Remark 1.** Equation (4) actually considers the junction of two dynamic programs: a first one  
 213 corresponding to the points with negative  $x$  values and a second one for positive values. This  
 214 separation around  $x = 0$  is not needed for Lemma 2, but allows for a cleaner analysis in Section 5.  
 215 Lemmas 1 and 2 also hold for any arbitrary choice of  $i_0$ . In particular for  $i_0 = 1$ , Equation (4) would  
 216 not consider the junction of two dynamic programs anymore, but a single one.

217 **Remark 2.** The assumption  $x_1 < 0$  and  $x_n \geq 0$  is not fundamental, but is only required to properly  
 218 define the junction mentioned in Remark 1. If all the  $x$  values are positive (or negative by symmetry),  
 219 the analysis of the right term in Equation (4) is simplified, since there is no junction to consider. In  
 220 particular, all the results from Section 5 hold without this assumption. These results are proven in the  
 221 hardest case  $x_1 < 0$  and  $x_n \geq 0$  in Appendix E, from which other cases can be directly deferred.

222 Lemma 2 formulates the minimisation of the representational cost among the interpolating functions  
 223 as a simpler dynamic program on the sequence of slopes at each  $x_i$ . This equivalence is the key  
 224 technical result of this work, from which Section 5 defers many properties on the minimiser(s) of  
 225 Equation (3).

## 226 5 Properties of minimal norm interpolator

227 Thanks to the dynamic program formulation given by Lemma 2, this section derives key properties on  
 228 the interpolating functions of minimal representational cost. In particular, it shows that Equation (3)  
 229 always admits a unique minimum. Moreover, under some condition on the training set, this minimising  
 230 function has the smallest number of kinks among the set of interpolators.

231 **Theorem 2.** The following optimisation problem admits a unique minimiser:

$$\inf_f \left\| \sqrt{1 + x^2} f'' \right\|_{\text{TV}} \quad \text{such that } \forall i \in [n], f(x_i) = y_i.$$

<sup>3</sup>Here, a single kink is used in the interval  $[x_i, x_{i+1}]$ , thanks to Lemma 3.

The proof of Theorem 2 uses the correspondence between interpolating functions and sequences of slopes  $(s_i)_{i \in [n]} \in \mathcal{S}$ , where the set  $\mathcal{S}$  is defined by Equation (21) in Appendix D.2. In particular, we show that the following problem admits a unique minimiser:

$$\min_{\mathbf{s} \in \mathcal{S}} \sum_{i=1}^{n-1} g_{i+1}(s_{i+1}, s_i). \quad (8)$$

We note in the following  $\mathbf{s}^* \in \mathcal{S}$  the unique minimiser of the problem in Equation (8). From this sequence of slopes  $\mathbf{s}^*$ , the unique minimising function of Equation (3) can be recovered. Moreover,  $\mathbf{s}^*$  minimises the dynamic program given by the functions  $c_i$  as follows:

$$\begin{aligned} c_{i+1}(s_{i+1}^*) &= g_{i+1}(s_{i+1}^*, s_i^*) + c_i(s_i^*) \quad \text{for any } i \in [i_0 - 2] \\ c_i(s_i^*) &= g_{i+1}(s_{i+1}^*, s_i^*) + c_{i+1}(s_{i+1}^*) \quad \text{for any } i \in \{i_0, \dots, n-1\}. \end{aligned}$$

Using simple properties of the functions  $c_i$  given by Lemma 7 in Appendix E, properties on  $\mathbf{s}^*$  can be derived besides the uniqueness of the minimal norm interpolator. Lemma 3 below gives a first intuitive property of this minimiser, which proves helpful in showing the main result of the section.

**Lemma 3.** *For any  $i \in [n]$ ,  $s_i^* \in [\min(\delta_{i-1}, \delta_i), \max(\delta_{i-1}, \delta_i)]$ , where  $\delta_0 := \delta_1$  and  $\delta_n := \delta_{n-1}$  by convention.*

A geometric interpretation of Lemma 3 is that the optimal (left or right) slope in  $x_i$  is between the line joining  $(x_{i-1}, y_{i-1})$  with  $(x_i, y_i)$  and the line joining  $(x_i, y_i)$  with  $(x_{i+1}, y_{i+1})$ .

## 5.1 Recovering a sparsest interpolator

We now aim at characterising when the minimiser of Equation (3) is among the set of sparsest interpolators, in terms of number of kinks. Before describing the minimal number of kinks required to fit the data in Lemma 4, we partition  $[x_1, x_n]$  into intervals of the form  $[x_{n_k}, x_{n_{k+1}})$  where

$$n_0 = 1 \text{ and for any } k \geq 0 \text{ such that } n_k < n,$$

$$n_{k+1} = \min \{j \in \{n_k + 1, \dots, n-1\} \mid \text{sign}(\delta_j - \delta_{j-1}) \neq \text{sign}(\delta_{j-1} - \delta_{j-2})\} \cup \{n\}, \quad (9)$$

and  $\text{sign}(0) := 0$  by convention. If we note  $f_{\text{lin}}$  the canonical piecewise linear interpolator, it is either convex, concave or affine on every interval  $[x_{n_k-1}, x_{n_{k+1}}]$ . This partitioning thus splits the space into convex, concave and affine parts of  $f_{\text{lin}}$ , as illustrated by Figure 2 on a toy example. This partition is crucial in describing the sparsest interpolators, thanks to Lemma 4.

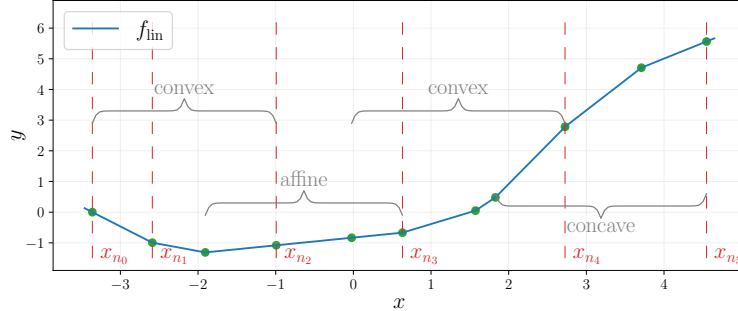

Figure 2: Partition given by  $(n_k)_k$  on a toy example.

252

**Lemma 4.** *If we denote by  $\|f''\|_0$  the cardinality of the support of the measure  $f''$ ,*

$$\min_{\substack{f \\ \forall i, f(x_i) = y_i}} \|f''\|_0 = \sum_{k \geq 1} \left\lceil \frac{n_{k+1} - n_k}{2} \right\rceil \mathbb{1}_{\delta_{n_k-1} \neq \delta_{n_k}}.$$

Lemma 4's proof idea is that for any interval  $[x_{n_k-1}, x_{n_{k+1}})$  where  $f_{\text{lin}}$  is convex (resp. concave) non affine, any function requires at least one positive (resp. negative) kink to fit the three data points in this interval. The result then comes from counting the number of such disjoint intervals and showing that a specific interpolator exactly reaches this number.

The minimal number of kinks required to interpolate the data is given by Lemma 4. Before giving the main result of this section, we introduce the following assumption on the data  $(x_k, y_k)_{k \in [n]}$ .

**Assumption 1.** *For the sequence  $(n_k)_k$  defined in Equation (9):*

$$n_{k+1} - n_k \leq 3 \text{ or } \delta_{n_k} = \delta_{n_k-1} \quad \text{for any } k \geq 0.$$

Assumption 1 exactly means there are no 6 (or more) consecutive points  $x_k, \dots, x_{k+5}$  such that  $f_{\text{lin}}$  is convex (without 3 aligned points) or concave on  $[x_k, x_{k+5}]$ . This assumption depends a lot on the structure of the true model function (if there is any). For example, it holds if the truth is given by a piecewise linear function, while it may not if the truth is given by a quadratic function. Theorem 3 below shows that under Assumption 1, the minimal cost interpolator is amongst the sparsest interpolators, in number of its kinks.

**Theorem 3.** *If Assumption 1 holds, then*

$$\underset{f}{\operatorname{argmin}}_{\forall i, f(x_i)=y_i} \|\sqrt{1+x^2}f''\|_{\text{TV}} \in \underset{f}{\operatorname{argmin}}_{\forall i, f(x_i)=y_i} \|f''\|_0. \quad (10)$$

Theorem 3 states conditions under which the interpolating function  $f$  with the smallest representational cost  $\bar{R}_1(f)$  also has the minimal number of kinks, i.e. ReLU hidden neurons, among the set of interpolators. It illustrates how norm regularisation, and in particular adding the biases' norm to the weight decay, favors estimators with a small number of neurons. While training neural networks with norm regularisation, the final estimator can actually have many non-zero neurons, but they all align towards a few key directions. As a consequence, the obtained estimator is actually equivalent to a small width network, meaning they have the same output for every input  $x \in \mathbb{R}$ .

Recall that such a sparsity does not hold when the bias terms are not regularised. More precisely, some sparsest interpolators have a minimal representational cost in that case, but there are also minimal cost interpolators with an arbitrarily large (even infinite) number of kinks [Debarre et al., 2022]. There is thus no particular reason that the obtained estimator is sparse when minimising the representational cost without penalising the bias terms. Section 6 empirically illustrates this difference of sparsity in the recovered estimators, depending on whether or not the bias parameters are penalised in the norm regularisation.

**Remark 3.** *Theorem 3 states that sparse recovery, given by Equation (10), occurs if Assumption 1 holds. When  $n_{k+1} - n_k \geq 4$ , i.e. there are convex regions of  $f_{\text{lin}}$  with at least 6 points, Appendix A gives a counterexample where Equation (10) does not hold. However, Equation (10) can still hold under weaker data assumptions than Assumption 1. In particular, Appendix A gives a necessary and sufficient condition for sparse recovery when there are convex regions with exactly 6 points. When we allow for convex regions with at least 7 points, it however becomes much harder to derive conditions where sparse recovery still occurs.*

**Remark 4.** *The counterexample presented in Appendix A reveals an unexpected outcome: minimal representational cost interpolators may not necessarily belong to the sparsest interpolators. This finding supports the idea that it may not be generally feasible to characterize minimal norm interpolators based on a specific measure [Vardi and Shamir, 2021], such as the number of kinks. We believe that this inherent limitation is one of the underlying reason for the different implicit regularization effects observed in settings such as matrix factorization [Gunasekar et al., 2017, Razin and Cohen, 2020, Li et al., 2020].*

## 5.2 Application to classification

In the binary classification setting, max-margin classifiers, defined as the minimiser of the problem

$$\min_f \bar{R}(f) \quad \text{such that } \forall i \in [n], y_i f(x_i) \geq 1, \quad (11)$$

are known to be the estimators of interest. Indeed, gradient descent on the cross entropy loss  $l(\hat{y}, y) = \log(1 + e^{-\hat{y}y})$  converges in direction to such estimators [Lyu and Li, 2019, Chizat and Bach, 2020]. Theorem 3 can be used to characterise max-margin classifiers, leading to Corollary 1.

**Corollary 1.**

$$\underset{f}{\operatorname{argmin}}_{\forall i \in [n], y_i f(x_i) \geq 1} \bar{R}_1(f) \in \underset{f}{\operatorname{argmin}}_{\forall i \in [n], y_i f(x_i) \geq 1} \|f''\|_0,$$

where the left minimisation problem admits a unique minimiser.

Theorem 3 yields that the max-margin classifier is unique and among the sparsest margin classifiers, when a free skip connection is allowed. We emphasise that no data assumptions are required for classification tasks, apart from being univariate.



## 6 Experiments

This section compares, through Figure 3, the estimators that are obtained with and without counting the bias terms in the regularisation, when training a one-hidden ReLU layer neural network. The code is made available in the supplementary material. For this experiment, we train neural networks by minimising the empirical loss, regularised with the  $\ell_2$  norm of the parameters (either with or without the bias terms) with a regularisation factor  $\lambda = 10^{-3}$ . Each neural network has  $m = 200$  hidden neurons and all parameters are initialised i.i.d. as centered Gaussian variables of variance  $1/\sqrt{m}$  (similar results are observed for larger initialisation scales).<sup>4</sup> There is no free skip connection here, which illustrates its benignity: the results that are expected by the above theory also happen without free skip connection. Experiments with a free skip connection are given in Appendix B and yield similar observations.

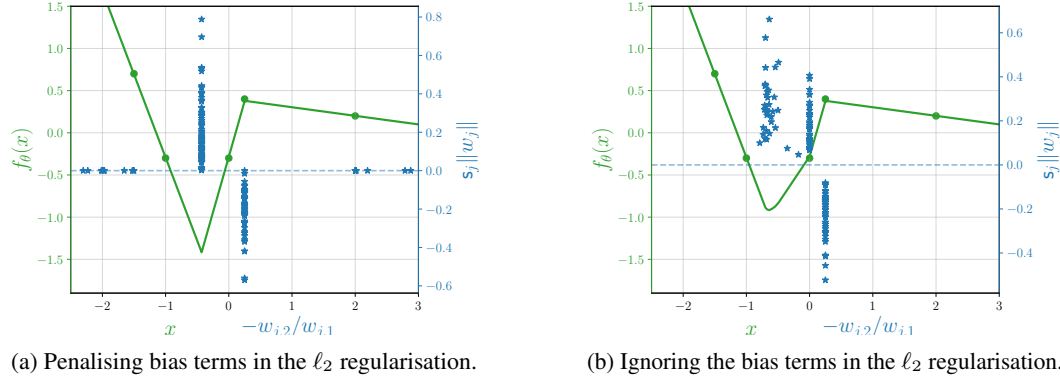

Figure 3: Final estimator when training one-hidden layer network with  $\ell_2$  regularisation. The green dots correspond to the data and the green line is the estimated function. Each blue star represents a hidden neuron  $(w_j, b_j)$  of the network: its  $x$ -axis value is given by  $-b_j/w_j$ , which coincides with the position of the kink of its associated ReLU; its  $y$ -axis value is given by the output weight  $a_j$ .

As predicted by our theoretical study, penalising the bias terms in the  $\ell_2$  regularisation enforces the sparsity of the final estimator. The estimator of Figure 3a indeed counts 2 kinks (the smallest number required to fit the data), while in Figure 3b, the directions of the neurons are scattered. More precisely, the estimator is almost *smooth* near  $x = -0.5$ , while the sparse estimator of Figure 3a is clearly not differentiable at this point. Also, the estimator of Figure 3b includes a clear additional kink at  $x = 0$ . Figure 3 thus illustrates that counting the bias terms in regularisation can lead to sparser estimators.

## 7 Conclusion

This work studies the importance of parameters' norm for one hidden ReLU layer neural networks in the univariate case. In particular, the parameters' norm required to represent a function is given by  $\|\sqrt{1+x^2}f''\|_{TV}$  when allowing for a free skip connection. In comparison to weight decay, which omits the bias parameters in the norm, an additional  $\sqrt{1+x^2}$  weighting term appears in the representational cost. This weighting is of crucial importance since it implies uniqueness of the minimal norm interpolator. Moreover, it favors sparsity of this interpolator in number of kinks. Minimising the parameters' norm (with the biases), which can be either obtained by explicit or implicit regularisation when training neural networks, thus leads to sparse interpolators. We believe this sparsity is a reason for the good generalisation properties of neural networks observed in practice.

Although these results provide some understanding of minimal norm interpolators, extending them to more general and difficult settings remains open. Even if the representational cost might be described in the multivariate case [as done by Ongie et al., 2019, without bias penalisation], characterising minimal norm interpolators seems very challenging in that case. Characterising minimal norm interpolators, with no free skip connection, also presents a major challenge for future work.

<sup>4</sup>For small initialisations, both methods yield sparse estimators, since implicit regularisation of the bias terms is significant in that case. Our goal is only to illustrate the differences in the minimisers of the two problems (with and without bias penalisation), without any optimisation consideration.

## References

- Francis Bach. Breaking the curse of dimensionality with convex neural networks. *The Journal of Machine Learning Research*, 18(1):629–681, 2017.
- Andrew R Barron. Universal approximation bounds for superpositions of a sigmoidal function. *IEEE Transactions on Information theory*, 39(3):930–945, 1993.
- Peter Bartlett. For valid generalization the size of the weights is more important than the size of the network. *Advances in neural information processing systems*, 9, 1996.
- Mikhail Belkin, Daniel Hsu, Siyuan Ma, and Soumik Mandal. Reconciling modern machine-learning practice and the classical bias–variance trade-off. *Proceedings of the National Academy of Sciences*, 116(32):15849–15854, 2019.
- Yoshua Bengio, Nicolas Roux, Pascal Vincent, Olivier Delalleau, and Patrice Marcotte. Convex neural networks. *Advances in neural information processing systems*, 18, 2005.
- Etienne Boursier, Loucas Pillaud-Vivien, and Nicolas Flammarion. Gradient flow dynamics of shallow relu networks for square loss and orthogonal inputs. *arXiv preprint arXiv:2206.00939*, 2022.
- Emmanuel J Candès and Carlos Fernandez-Granda. Towards a mathematical theory of super-resolution. *Communications on pure and applied Mathematics*, 67(6):906–956, 2014.
- Scott Shaobing Chen, David L Donoho, and Michael A Saunders. Atomic decomposition by basis pursuit. *SIAM review*, 43(1):129–159, 2001.
- Lenaïc Chizat and Francis Bach. Implicit bias of gradient descent for wide two-layer neural networks trained with the logistic loss. In *Conference on Learning Theory*, pages 1305–1338. PMLR, 2020.
- Thomas Debarre, Quentin Denoyelle, Michael Unser, and Julien Fageot. Sparsest piecewise-linear regression of one-dimensional data. *Journal of Computational and Applied Mathematics*, 406: 114044, 2022.
- Carlos Fernandez-Granda. Super-resolution of point sources via convex programming. *Information and Inference: A Journal of the IMA*, 5(3):251–303, 2016.
- Ian Goodfellow, Yoshua Bengio, and Aaron Courville. *Deep Learning*. MIT Press, 2016. <http://www.deeplearningbook.org>.
- Suriya Gunasekar, Blake E Woodworth, Srinadh Bhojanapalli, Behnam Neyshabur, and Nati Srebro. Implicit regularization in matrix factorization. *Advances in Neural Information Processing Systems*, 30, 2017.
- Kaiming He, Xiangyu Zhang, Shaoqing Ren, and Jian Sun. Deep residual learning for image recognition. In *Proceedings of the IEEE conference on computer vision and pattern recognition*, pages 770–778, 2016.
- Ziwei Ji and Matus Telgarsky. The implicit bias of gradient descent on nonseparable data. In *Conference on Learning Theory*, pages 1772–1798. PMLR, 2019.
- Anders Krogh and John Hertz. A simple weight decay can improve generalization. *Advances in neural information processing systems*, 4, 1991.
- Vera Kurková and Marcello Sanguineti. Bounds on rates of variable-basis and neural-network approximation. *IEEE Transactions on Information Theory*, 47(6):2659–2665, 2001.
- Zhiyuan Li, Yuping Luo, and Kaifeng Lyu. Towards resolving the implicit bias of gradient descent for matrix factorization: Greedy low-rank learning. *arXiv preprint arXiv:2012.09839*, 2020.
- Kaifeng Lyu and Jian Li. Gradient descent maximizes the margin of homogeneous neural networks. In *International Conference on Learning Representations*, 2019.

381 Behnam Neyshabur, Ryota Tomioka, and Nathan Srebro. In search of the real inductive bias: On the  
382 role of implicit regularization in deep learning. *arXiv preprint arXiv:1412.6614*, 2014.

383 Andrew Ng. Sparse autoencoder. *CS294A Lecture notes*, 72(2011):1–19, 2011.

384 Greg Ongie, Rebecca Willett, Daniel Soudry, and Nathan Srebro. A function space view of bounded  
385 norm infinite width relu nets: The multivariate case. In *International Conference on Learning*  
386 *Representations (ICLR 2020)*, 2019.

387 Rahul Parhi and Robert D Nowak. Banach space representer theorems for neural networks and ridge  
388 splines. *Journal of Machine Learning Research*, 22(43):1–40, 2021.

389 Rahul Parhi and Robert D Nowak. Deep learning meets sparse regularization: A signal processing  
390 perspective. *arXiv preprint arXiv:2301.09554*, 2023.

391 Clarice Poon, Nicolas Keriven, and Gabriel Peyré. Support localization and the fisher metric for  
392 off-the-grid sparse regularization. In *The 22nd International Conference on Artificial Intelligence*  
393 *and Statistics*, pages 1341–1350. PMLR, 2019.

394 Noam Razin and Nadav Cohen. Implicit regularization in deep learning may not be explainable by  
395 norms. *Advances in neural information processing systems*, 33:21174–21187, 2020.

396 Clayton Sanford, Navid Ardeshtir, and Daniel Hsu. Intrinsic dimensionality and generalization  
397 properties of the  $\mathcal{R}$ -norm inductive bias. *arXiv preprint arXiv:2206.05317*, 2022.

398 Pedro Savarese, Itay Evron, Daniel Soudry, and Nathan Srebro. How do infinite width bounded norm  
399 networks look in function space? In *Conference on Learning Theory*, pages 2667–2690. PMLR,  
400 2019.

401 Daniel Soudry, Elad Hoffer, Mor Shpigel Nacson, Suriya Gunasekar, and Nathan Srebro. The implicit  
402 bias of gradient descent on separable data. *The Journal of Machine Learning Research*, 19(1):  
403 2822–2878, 2018.

404 Lawrence Stewart, Francis Bach, Quentin Berthet, and Jean-Philippe Vert. Regression as classification:  
405 Influence of task formulation on neural network features. *arXiv preprint arXiv:2211.05641*, 2022.

406 Gal Vardi and Ohad Shamir. Implicit regularization in relu networks with the square loss. In  
407 *Conference on Learning Theory*, pages 4224–4258. PMLR, 2021.

408 Yifei Wang, Jonathan Lacotte, and Mert Pilanci. The hidden convex optimization landscape of  
409 regularized two-layer relu networks: an exact characterization of optimal solutions. In *International*  
410 *Conference on Learning Representations*, 2021.

411 Chiyuan Zhang, Samy Bengio, Moritz Hardt, Benjamin Recht, and Oriol Vinyals. Understanding deep  
412 learning (still) requires rethinking generalization. *Communications of the ACM*, 64(3):107–115,  
413 2021.

## A Discussing Assumption 1

Theorem 3 requires Assumption 1, which assumes that there are no convex (or concave) regions of  $f_{\text{lin}}$  with at least 6 data points. Actually, when there is a convex (or concave) region with exactly 6 data points, i.e.  $n_{k+1} = n_k + 4$ , Theorem 3 holds (for this region) if and only if for  $i = n_k + 1$ :

$$\frac{\langle u_i, w_{i-1} \rangle \langle u_{i+1}, w_{i+1} \rangle}{\|w_{i-1}\| \|w_{i+1}\|} - \langle u_i, u_{i+1} \rangle \leq \sqrt{\|u_i\|^2 - \frac{\langle u_i, w_{i-1} \rangle^2}{\|w_{i-1}\|^2}} \sqrt{\|u_{i+1}\|^2 - \frac{\langle u_{i+1}, w_{i+1} \rangle^2}{\|w_{i+1}\|^2}} \quad (12)$$

where  $u_i = (x_i, 1)$ ;  $w_{i-1} = \frac{\delta_i - \delta_{i-1}}{\delta_i - \delta_{i-2}}(x_i, 1) + \frac{\delta_{i-1} - \delta_{i-2}}{\delta_i - \delta_{i-2}}(x_{i-1}, 1)$ ;  
and  $u_{i+1} = (x_{i+1}, 1)$ ;  $w_{i+1} = \frac{\delta_{i+2} - \delta_{i+1}}{\delta_{i+2} - \delta_i}(x_{i+2}, 1) + \frac{\delta_{i+1} - \delta_i}{\delta_{i+2} - \delta_i}(x_{i+1}, 1)$ .

The proof of this result (omitted here) shows that the problem

$$\min_{(s_i, s_{i+1}) \in [\delta_{i-1}, \delta_i] \times [\delta_i, \delta_{i+1}]} g_i(s_i, s_{i-1}^*) + g_{i+1}(s_{i+1}, s_i) + g_{i+2}(s_{i+2}^*, s_{i+1})$$

is minimised for  $(s_i, s_{i+1}) = (\delta_i, \delta_i)$  if and only if Equation (12) holds, which corresponds to the (unique) sparsest way to interpolate the data on this convex region. To show that the minimum is reached at that point, we can first notice that  $s_{i-1}^* = \delta_{i-2}$  and  $s_{i+2}^* = \delta_{i+2}$ . Then, it requires a meticulous study of the directional derivatives of the (convex but non-differentiable) objective function at the point  $(\delta_i, \delta_i)$ .

Figure 4 below illustrates a case of 6 data points, where the condition of Equation (12) does not hold. Clearly, the minimal norm interpolator differs from the (unique) sparsest interpolator in that case.

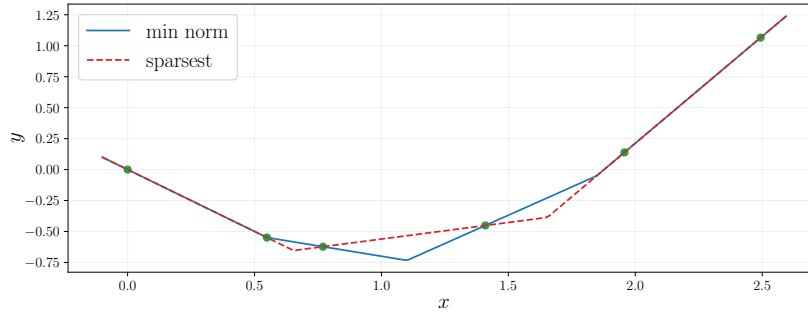

Figure 4: Case of difference between minimal norm interpolator and sparsest interpolator.

When considering more than 6 points, studying the minimisation problem becomes cumbersome and no simple condition of sparse recovery can be derived. When generating random data with large convex regions, e.g. 35 points, the minimal norm interpolator is rarely among the sparsest interpolators. Moreover, it seems that its number of kinks could be arbitrarily close to 34, which is the trivial upper bound of the number of kinks given by Lemma 3; while the sparsest interpolators only have 17 kinks.

## B Additional experiments

Figure 5 shows the minimiser of Equation (3) on the toy example of Figure 2. The minimising function is computed thanks to the dynamic program given by Lemma 2. Although the variables of this dynamic program are continuous, we can efficiently solve it by approximating the constraint space of each slope  $s_i$  as a discrete grid of  $[\delta_{i-1}, \delta_i]$  thanks to Lemma 3. For the data used in Figure 5, Assumption 1 holds. It is clear that the minimiser is very sparse, counting only 4 kinks. The partition given by Figure 2 then shows that this is indeed the smaller possible number of kinks, thanks to Lemma 4. On the other hand, the canonical piecewise linear interpolator  $f_{\text{lin}}$  is not as sparse and counts 7 kinks here.

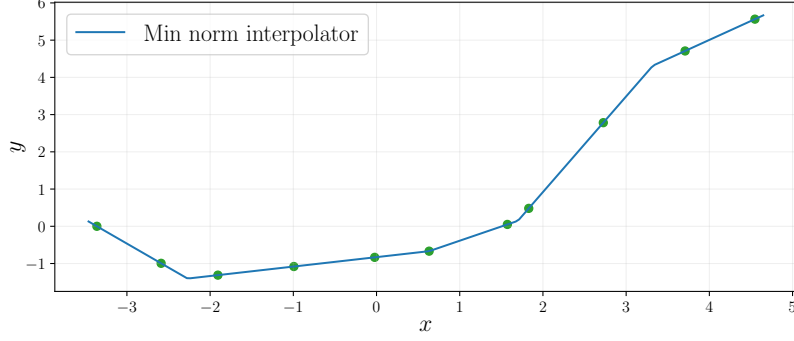

Figure 5: Minimiser of Equation (3) on a toy data example.

Figure 6 considers the exact same setting as Figure 3 in Section 6. The only difference is that we here allow a free skip connection in the neural network architecture, which represents the setting exactly described by Theorem 3.

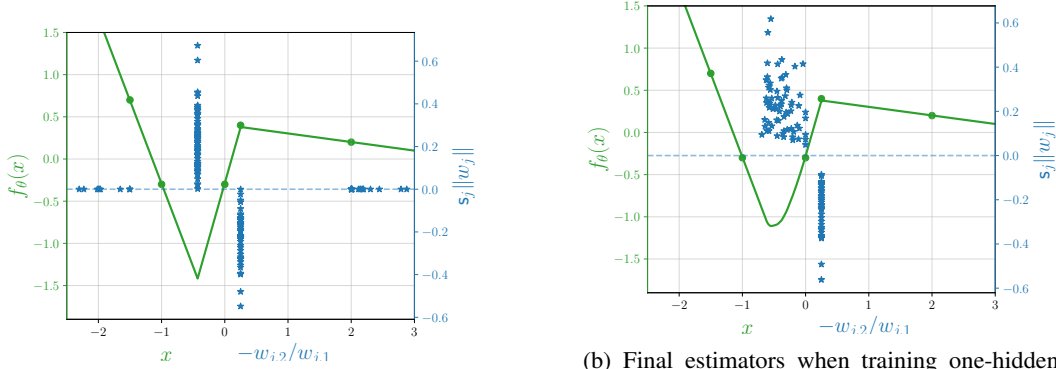

(a) Final estimator when penalising bias terms in the  $\ell_2$  regularisation.

(b) Final estimators when training one-hidden ReLU neural networks with  $\ell_2$  regularisation and a free skip connection.

Figure 6: Final estimators when training one-hidden ReLU neural networks with  $\ell_2$  regularisation. The green dots correspond to the data, while the green line is the estimated function. Each blue star represents a hidden neuron  $(w_j, b_j)$  of the network: its  $x$ -axis value is given by  $-b_j/w_j$ , which coincides with the position of the kink of its associated ReLU; its  $y$ -axis value is given by the output layer weight  $a_j$ .

Similar observations can be made: the obtained estimator when counting the bias terms in regularisation only has 2 kinks, while the estimator obtained by omitting the biases in the regularisation is much smoother (and thus much less sparse in the number of kinks). The only difference is that the latter estimator here does not have a clear kink at  $x = 0$ , but is instead even smoother on the interval  $[-0.5, 0]$ . This is explained by the presence of more scattered kinks in this interval. Despite this slight difference, the main observation remains unchanged: the estimator is a sparsest one when counting the bias terms, while it counts a lot of kinks (and is even smooth) when omitting the biases.

## C Proofs of Section 3

Theorem 4 below extends the characterisation of the representational cost  $\bar{R}_1(f)$  of Theorem 1.

**Theorem 4.** For any Lipschitz function  $f : \mathbb{R} \rightarrow \mathbb{R}$ ,

$$\bar{R}_1(f) = \left\| \sqrt{1+x^2} f'' \right\|_{\text{TV}} = \int_{\mathbb{R}} \sqrt{1+x^2} d|f''|(x)$$

and  $\bar{R}(f) = \left\| \sqrt{1+x^2} f'' \right\|_{\text{TV}} + D(x_f, \mathcal{C}_f),$

455 where

$$\begin{aligned} x_f &= \left( f'(+\infty) + f'(-\infty), f(0) - \int_{\mathbb{R}} |x| df''(x) \right) \\ \mathcal{C}_f &= \left\{ \int_{\mathbb{R}} \varphi(x) df''(x), - \int_{\mathbb{R}} x\varphi(x) df''(x) \mid \|\varphi\|_{\infty} \leq 1 \right\} \\ D(x_f, \mathcal{C}_f) &= \inf_{x \in \mathcal{C}_f} \|x - x_f\|. \end{aligned}$$

456 For any non-Lipschitz function,  $\bar{R}_1(f) = \bar{R}(f) = +\infty$ .

457 *Proof.* We only prove the equality on  $\bar{R}(f)$  here. The other part of Theorem 4 can be directly deduced  
 458 from this proof. First assume that  $\bar{R}(f)$  is finite. We can then consider some  $\mu \in \mathcal{M}(\mathbb{S}_1)$  such  
 459 that for any  $x \in \mathbb{R}$ ,  $f(x) = \int_{\mathbb{S}_1} \sigma(wx + b) d\mu(w, b)$ . Note that  $f$  is necessarily  $\|\mu\|_{\text{TV}}$ -Lipschitz,  
 460 which proves the second part of Theorem 4. Without loss of generality, we can parameterise  $\mathbb{S}_1$  on  
 461  $\theta \in [-\frac{\pi}{2}, \frac{3\pi}{2})$  with  $T^{-1}(\theta) = (\cos \theta, \sin \theta)$ . If we note  $\nu = T_{\#}\mu$  the pushforward measure of  $\mu$   
 462 by  $T$ , we then have

$$f(x) = \int_{-\frac{\pi}{2}}^{\frac{3\pi}{2}} \sigma(x \cos \theta + \sin \theta) d\nu(\theta). \quad (13)$$

463 Since the total variation of  $\mu$  and thus  $\nu$  is bounded, we can derive under the integral sign:

$$f'(x) = \int_{-\frac{\pi}{2}}^{\frac{3\pi}{2}} \cos \theta \mathbf{1}_{x \cos \theta + \sin \theta \geq 0} d\nu(\theta).$$

464 Now note that  $x \cos \theta + \sin \theta \geq 0$  if and only if  $\theta \in [-\arctan(x), \pi - \arctan(x)]$  since  $\theta \in [-\frac{\pi}{2}, \frac{3\pi}{2})$ ,  
 465 i.e.

$$f'(x) = \int_{-\arctan x}^{\pi - \arctan x} \cos \theta d\nu(\theta).$$

466 When deriving this expression over  $x$ , we finally get for the distribution  $f''$

$$\begin{aligned} df''(x) &= - \frac{\cos(\pi - \arctan(x)) d\nu(\pi - \arctan(x)) - \cos(-\arctan(x)) d\nu(-\arctan(x))}{1 + x^2} \\ &= \frac{\cos(\arctan(x))(d\nu(\pi - \arctan(x)) + d\nu(-\arctan(x)))}{1 + x^2}. \end{aligned}$$

467 This equality is straightforward for continuous distributions  $\nu$ . Extending it to any distribution  
 468  $\nu$  requires some extra work but can be obtained following the typical definition of distributional  
 469 derivative.

470 Defining  $\nu_+(\theta) = \nu(\theta) + \nu(\pi + \theta)$  for any  $\theta \in [-\frac{\pi}{2}, \frac{\pi}{2})$  and noting that  $\cos(\arctan x) = \frac{1}{\sqrt{1+x^2}}$ ,

$$\forall x \in \mathbb{R}, \sqrt{1+x^2} df''(x) = \frac{d\nu_+(-\arctan(x))}{1+x^2}.$$

471 Or equivalently, for any  $\theta \in (-\frac{\pi}{2}, \frac{\pi}{2})$

$$\frac{df''(-\tan \theta)}{\cos \theta} = \cos^2(\theta) d\nu_+(\theta). \quad (14)$$

472 Similarly to the proof of Savarese et al. [2019],  $f''$  fixes  $\nu_+$  and the only degree of freedom is on  
 473  $\nu_{\perp}(\theta) := \nu(\theta) - \nu(\pi + \theta)$ . The proof now determines which valid  $\nu_{\perp}$  minimises  $\|\mu\|_{\text{TV}} = \|\nu\|_{\text{TV}}$ .  
 474 Equation (13) implies the following condition on  $\nu_{\perp}$

$$\begin{aligned} f(x) &= \frac{1}{2} \int_{-\frac{\pi}{2}}^{\frac{\pi}{2}} \sigma(-x \cos \theta - \sin \theta) d(\nu_+ + \nu_{\perp})(\theta) + \frac{1}{2} \int_{-\frac{\pi}{2}}^{\frac{\pi}{2}} \sigma(x \cos \theta + \sin \theta) d(\nu_+ - \nu_{\perp})(\theta) \\ &= \frac{1}{2} \int_{-\frac{\pi}{2}}^{\frac{\pi}{2}} |x \cos \theta + \sin \theta| d\nu_+(\theta) + \frac{x}{2} \int_{-\frac{\pi}{2}}^{\frac{\pi}{2}} \cos \theta d\nu_{\perp}(\theta) + \frac{1}{2} \int_{-\frac{\pi}{2}}^{\frac{\pi}{2}} \sin \theta d\nu_{\perp}(\theta). \end{aligned}$$

475 While  $\nu_+$  is given by  $f''$ ,  $\nu_{\perp}$  holds for affine part of  $f$ . The above equality directly leads to the  
 476 following condition on  $\nu_{\perp}$

$$\begin{cases} \int_{-\frac{\pi}{2}}^{\frac{\pi}{2}} \cos \theta d\nu_{\perp}(\theta) = f'(+\infty) + f'(\infty) \\ \int_{-\frac{\pi}{2}}^{\frac{\pi}{2}} \sin \theta d\nu_{\perp}(\theta) = f(0) - \int_{-\frac{\pi}{2}}^{\frac{\pi}{2}} |\sin \theta| d\nu_+(\theta) \end{cases}. \quad (15)$$

477 Now note that  $2\|\mu\|_{\text{TV}} = \|\nu_+ + \nu_\perp\|_{\text{TV}} + \|\nu_+ - \nu_\perp\|_{\text{TV}}$ , so that  $\bar{R}(f)$  is given by

$$2\bar{R}(f) = \min_{\nu_\perp} \|\nu_+ + \nu_\perp\|_{\text{TV}} + \|\nu_+ - \nu_\perp\|_{\text{TV}} \quad \text{such that } \nu_\perp \text{ verifies Equation (15).}$$

478 Lemma 5 below then implies<sup>5</sup>

$$\bar{R}(f) = \|\nu_+\|_{\text{TV}} + D(x_f, \mathcal{C}_f),$$

479 where  $x_f$  and  $\mathcal{C}_f$  are defined in Theorem 4. Equation (14) leads with a simple change of variable

480 when  $\bar{R}(f)$  is finite to

$$\bar{R}(f) = \left\| \sqrt{1+x^2} f'' \right\|_{\text{TV}} + D(x_f, \mathcal{C}_f).$$

481 Reciprocally, when  $\left\| \sqrt{1+x^2} f'' \right\|_{\text{TV}}$  is finite, we can define  $\nu_+$  as in Equation (14) and  $\nu_\perp$  as a sum  
482 of Diracs in  $-\frac{\pi}{2}$  and 0 verifying Equation (15). The corresponding  $\mu$  is then of finite total variation,  
483 implying that  $\bar{R}(f)$  is finite. This ends the proof of the first part of Theorem 4:

$$\bar{R}(f) = \left\| \sqrt{1+x^2} f'' \right\|_{\text{TV}} + D(x_f, \mathcal{C}_f).$$

484 For  $\bar{R}_1(f)$ , the analysis is simpler since there is no constraint on  $\nu_\perp$ , whose optimal choice is then  
485 given by  $\nu_\perp = 0$ .  $\square$

486 **Lemma 5.** *The minimisation program*

$$\begin{aligned} & \min_{\nu_\perp} \int_{-\frac{\pi}{2}}^{\frac{\pi}{2}} d|\nu_+ + \nu_\perp| + \int_{-\frac{\pi}{2}}^{\frac{\pi}{2}} d|\nu_+ - \nu_\perp| \\ & \text{such that } \left( \int_{-\pi/2}^{\pi/2} \cos \theta d\nu_\perp(\theta), \int_{-\pi/2}^{\pi/2} \sin \theta d\nu_\perp(\theta) \right) = (a, b) \end{aligned} \quad (16)$$

487 is equivalent to

$$\begin{aligned} & 2 \int_{-\frac{\pi}{2}}^{\frac{\pi}{2}} d|\nu_+| + 2 \min_{u \in \mathcal{C}} \|(a, b) - u\|, \\ & \text{where } \mathcal{C} = \left\{ \left( \int_{-\frac{\pi}{2}}^{\frac{\pi}{2}} \cos(\theta) \varphi(\theta) d\nu_+(\theta), \int_{-\frac{\pi}{2}}^{\frac{\pi}{2}} \sin(\theta) \varphi(\theta) d\nu_+(\theta) \right) \mid \|\varphi\|_\infty \leq 1 \right\}. \end{aligned} \quad (17)$$

488 *Proof.* For any  $\nu_\perp$  in the constraint set of Equation (16), we can use a decomposition  $\nu_\perp = \varphi\nu_+ + \mu_2$   
489 where  $\|\varphi\|_\infty \leq 1$ . It then comes pointwise

$$\begin{aligned} |\nu_+ + \nu_\perp| + |\nu_+ - \nu_\perp| & \leq 2|\mu_2| + |(1+\varphi)\nu_+| + |(1-\varphi)\nu_+| \\ & = 2|\mu_2| + 2|\nu_+|. \end{aligned} \quad (18)$$

490 As a consequence, if we note  $v$  the infimum given by Equation (16):

$$v \leq 2 \int_{-\frac{\pi}{2}}^{\frac{\pi}{2}} d|\nu_+| + 2 \min_{(\varphi, \mu_2) \in \Gamma} \int_{-\frac{\pi}{2}}^{\frac{\pi}{2}} d|\mu_2|,$$

491 where

$$\Gamma = \left\{ (\varphi, \mu_2) \mid \|\varphi\|_\infty \leq 1 \text{ and } \int_{-\pi/2}^{\pi/2} (\cos \theta, \sin \theta) (\varphi(\theta) d\nu_+(\theta) + d\mu_2(\theta)) = (a, b) \right\}.$$

492 Moreover for a fixed  $\nu_\perp$ , we can choose  $(\varphi, \mu_2)$  as:

$$\begin{cases} \varphi = \text{sign}\left(\frac{d\nu_\perp}{d\nu_+}\right) \min\left(\left|\frac{d\nu_\perp}{d\nu_+}\right|, 1\right), \\ \mu_2 = \nu_\perp - \varphi\nu_+, \end{cases}$$

493 where  $\frac{d\nu_\perp}{d\nu_+}$  denotes by abuse of notation the Radon-Nikodym derivative  $\frac{d\nu_a}{d\nu_+}$ , with the Lebesgue  
494 decomposition  $\nu_\perp = \nu_a + \nu_s$  with  $\nu_a \ll \nu_+$  and  $\nu_s \perp \nu_+$ . For this choice, Equation (18) becomes  
495 an equality, which directly implies that

$$v = 2 \int_{-\frac{\pi}{2}}^{\frac{\pi}{2}} d|\nu_+| + 2 \min_{(\varphi, \mu_2) \in \Gamma} \int_{-\frac{\pi}{2}}^{\frac{\pi}{2}} d|\mu_2|.$$

---

<sup>5</sup>A change of variable is also necessary to observe that the min of Lemma 5 is equal to  $D(x_f, \mathcal{C}_f)$ .

496 It now remains to prove that  $\min_{u \in \mathcal{C}} \|(a, b) - u\|^2 = \min_{(\varphi, \mu_2) \in \Gamma} \int_{-\pi/2}^{\pi/2} d|\mu_2|$ . Fix in the following  $\varphi$  such  
 497 that  $\|\varphi\|_\infty \leq 1$  and note

$$\begin{cases} x = a - \int_{-\pi/2}^{\pi/2} \cos \theta \varphi(\theta) d\nu_+(\theta), \\ y = b - \int_{-\pi/2}^{\pi/2} \sin \theta \varphi(\theta) d\nu_+(\theta). \end{cases}$$

498 It now suffices to show that for any fixed  $\varphi$ :

$$\min_{\mu_2 \text{ s.t. } (\varphi, \mu_2) \in \Gamma} \int_{-\pi/2}^{\pi/2} d|\mu_2| = \|(x, y)\|.$$

499 The constraint set is actually  $\{\mu_2 \mid \int_{-\pi/2}^{\pi/2} (\cos \theta, \sin \theta) d\mu_2(\theta) = (x, y)\}$ . Now define

$$\theta^* = \arcsin\left(\frac{\text{sign}(x)y}{\sqrt{x^2 + y^2}}\right) \quad \text{and} \quad \mu_2^* = \text{sign}(x)\sqrt{x^2 + y^2}\delta_{\theta^*},$$

500 where  $\delta_{\theta^*}$  is the Dirac distribution located at  $\theta^*$ . This definition is only valid if  $x \neq 0$ , otherwise we  
 501 choose  $\mu_2^* = -y\delta_{-\pi/2}$ .

502 Note that  $\mu_2^*$  is in the constraint set and  $\int_{-\pi/2}^{\pi/2} d|\mu_2| = \|(x, y)\|$ , i.e.

$$\min_{\mu_2 \text{ s.t. } (\varphi, \mu_2) \in \Gamma} \int_{-\pi/2}^{\pi/2} d|\mu_2| \leq \|(x, y)\|.$$

503 Now consider any  $\mu_2$  in the constraint set and decompose  $\mu_2 = \mu_2^+ - \mu_2^-$  with  $(\mu_2^+, \mu_2^-) \in$   
 504  $\mathcal{M}_+([-\pi/2, \pi/2])^2$ . Define

$$\begin{aligned} (x_+, y_+) &= \left( \int_{-\pi/2}^{\pi/2} \cos \theta d\mu_2^+, \int_{-\pi/2}^{\pi/2} \sin \theta d\mu_2^+ \right) \\ (x_-, y_-) &= \left( \int_{-\pi/2}^{\pi/2} \cos \theta d\mu_2^-, \int_{-\pi/2}^{\pi/2} \sin \theta d\mu_2^- \right) \end{aligned}$$

505 By Cauchy-Schwarz inequality,

$$\begin{aligned} \int \cos^2(\theta) d\mu_2^+(\theta) \int d\mu_2^+(\theta) &\geq x_+^2, \\ \int \sin^2(\theta) d\mu_2^+(\theta) \int d\mu_2^+(\theta) &\geq y_+^2. \end{aligned}$$

Summing these two inequalities yields

$$\int d\mu_2^+ \geq \sqrt{x_+^2 + y_+^2}.$$

Similarly, we have

$$\int d\mu_2^- \geq \sqrt{x_-^2 + y_-^2}.$$

506 Recall that  $\int d|\mu_2| = \int d\mu_2^+ + \int d\mu_2^-$ . By triangle inequality, this yields:

$$\begin{aligned} \int d|\mu_2| &\geq \|(x_+, y_+)\| + \|(x_-, y_-)\| \\ &\geq \|(x_+, y_+) - (x_-, y_-)\| = \|(x, y)\|. \end{aligned}$$

507 As a consequence:

$$\min_{\mu_2 \text{ s.t. } (\varphi, \mu_2) \in \Gamma} \int_{-\pi/2}^{\pi/2} d|\mu_2| \geq \|(x, y)\|.$$

508 We finally showed that

$$\min_{\mu_2 \text{ s.t. } (\varphi, \mu_2) \in \Gamma} \int_{-\pi/2}^{\pi/2} d|\mu_2| = \left\| (a, b) - \left( \int_{-\pi/2}^{\pi/2} \cos \theta \varphi(\theta) d\nu_+(\theta), \int_{-\pi/2}^{\pi/2} \sin \theta \varphi(\theta) d\nu_+(\theta) \right) \right\|.$$

509 This leads to Lemma 5 when taking the infimum over  $\varphi$ .  $\square$



## 510 D Proof of Section 4

### 511 D.1 Proof of Lemma 1

512 We first need to show the existence of a minimum. Using the definition of  $\bar{R}_1(f)$  and Theorem 1,  
513 Equation (3) is equivalent to

$$\inf_{\mu, a, b} \|\mu\|_{TV} \quad \text{such that for any } i \in [n], f_{\mu, a, b}(x_i) = y_i. \quad (19)$$

514 Consider a sequence  $(\mu_j, a_j, b_j)_j$  such that  $f_{\mu_j, a_j, b_j}(x_i) = y_i$  for any  $i$  and  $j$  and  $\|\mu_j\|_{TV}$  converges  
515 to the infimum of Equation (19). The sequence  $\|\mu_j\|_{TV}$  is necessarily bounded. This also implies that  
516 both  $(a_j)$  and  $(b_j)$  are bounded<sup>6</sup>. Since the space of finite signed measures on  $\mathbb{S}_1$  is a Banach space,  
517 there is a subsequence converging weakly towards some  $(\mu, a, b)$ . By weak convergence,  $(\mu, a, b)$  is  
518 in the constraints set of Equation (19) and  $\|\mu\|_{TV} = \lim_j \|\mu_j\|_{TV}$ .  $(\mu, a, b)$  is thus a minimiser of  
519 Equation (19). We thus proved the existence of a minimum for Equation (3), which is reached for  
520  $f_{\mu, a, b}$ .

521 Define for the sake of the proof the activation cones  $C_i$  as

$$\begin{aligned} C_0 &= \{\theta \in \mathbb{R}^2 \mid \forall i = 1, \dots, n, \langle \theta, (x_i, 1) \rangle \geq 0\}, \\ C_i &= \{\theta \in \mathbb{R}^2 \mid \langle \theta, (x_{i+1}, 1) \rangle \geq 0 > \langle \theta, (x_i, 1) \rangle\} \quad \text{for any } i = 1, \dots, i_0 - 2, \\ C_{i_0-1} &= \{\theta \in \mathbb{R}^2 \mid \langle \theta, (x_{i_0}, 1) \rangle > 0 > \langle \theta, (x_{i_0-1}, 1) \rangle\}, \\ C_i &= \{\theta \in \mathbb{R}^2 \mid \langle \theta, (x_{i+1}, 1) \rangle > 0 \geq \langle \theta, (x_i, 1) \rangle\} \quad \text{for any } i = i_0, \dots, n-1, \\ C_n &= \{\theta \in \mathbb{R}^2 \setminus \{0\} \mid \forall i = 1, \dots, n, \langle \theta, (x_i, 1) \rangle \leq 0\}. \end{aligned}$$

522 As the  $x_i$  are ordered, note that  $(C_0, C_1, -C_1, \dots, C_{n-1}, -C_{n-1}, C_n)$  forms a partition of  $\mathbb{R}^2$ . To  
523 prove Lemma 1, it remains to show that any minimiser  $(\mu_a, b)$  of Equation (19) has a function  $f_{\mu, a, b}$   
524 of the form

$$f_{\mu, a, b}(x) = \tilde{a}x + \tilde{b} + \sum_{i=1}^{n-1} \tilde{a}_i \sigma(\langle \theta_i, (x, 1) \rangle) \quad \text{where } \theta_i \in C_i.$$

525 Let  $f$  be a minimiser of Equation (3). Let  $\mu, a, b$  be a minimiser of Equation (19) such that  $f_{\mu, a, b} = f$ .

526 Define  $\tilde{\mu}, \tilde{a}, \tilde{b}$  as

$$d\tilde{\mu}(\theta) = \begin{cases} d\mu(\theta) + d\mu(-\theta) & \text{for } \theta \in C_i \text{ for any } i = 1, \dots, n-1 \\ 0 & \text{for } \theta \in -C_i \text{ for any } i = 1, \dots, n-1 \\ d\mu(\theta) & \text{otherwise,} \end{cases}$$

$$\tilde{a} = a - \sum_{j=1}^{n-1} \int_{-C_j} \theta_1 d\mu(\theta),$$

$$\tilde{b} = b - \sum_{j=1}^{n-1} \int_{-C_j} \theta_2 d\mu(\theta).$$

527 Thanks to the identity  $\sigma(u) - u = \sigma(-u)$ ,  $f_{\mu, a, b} = f_{\tilde{\mu}, \tilde{a}, \tilde{b}}$ . Moreover,  $\|\tilde{\mu}\|_{TV} \leq \|\mu\|_{TV}$ , so we can  
528 assume w.l.o.g. that the support of  $\mu$  is included<sup>7</sup> in  $\bigcup_{i=0}^n C_i$ . In that case, for any  $i = 1, \dots, n$

$$\begin{aligned} f(x_i) &= ax_i + b + \sum_{j=0}^{i-1} \int_{C_j} \langle \theta, (x_i, 1) \rangle d\mu(\theta) \\ &= ax_i + b + \sum_{j=0}^{i-1} \left\langle \int_{C_j} \theta d\mu(\theta), (x_i, 1) \right\rangle. \end{aligned} \quad (20)$$

<sup>6</sup>To see that, we can first consider the difference  $f_{\mu_j, a_j, b_j}(x_1) - f_{\mu_j, a_j, b_j}(x_2)$  to show that  $(a_j)_j$  is bounded. This then leads to the boundedness of  $(b_j)_j$  when considering  $f_{\mu_j, a_j, b_j}(x_1)$ .

<sup>7</sup>We here transform the triple  $(\mu, a, b)$ , but the corresponding function  $f$  remains unchanged.

529 First, the reduction

$$\tilde{a} = a + \int_{C_0} \theta_1 d\mu(\theta)$$

$$\tilde{b} = b + \int_{C_0} \theta_2 d\mu(\theta)$$

$$\tilde{\mu} = \mu|_{\bigcup_{i=1}^{n-1} C_i},$$

530 does not increase the total variation of  $\mu$  and still interpolates the data. As a consequence, the support  
531 of  $\mu$  is included in  $\bigcup_{i=1}^{n-1} C_i$ . Now let  $\mu = \mu_+ - \mu_-$  be the Jordan decomposition of  $\mu$  and define for  
532 any  $i \in [n-1]$

$$\alpha_i = \int_{C_i} \theta d\mu_+(\theta) \quad \text{and} \quad \beta_i = \int_{C_i} \theta d\mu_-(\theta).$$

533 Note that  $\alpha_i$  and  $\beta_i$  are both in the positive convex cone  $C_i$ . For  $\theta_i := \alpha_i - \beta_i$ , Equation (20) rewrites

$$f(x_i) = ax_i + b + \sum_{j=1}^{i-1} \langle \theta_j, (x_i, 1) \rangle.$$

534 If  $\theta_i \in \overline{C_i} \cup -\overline{C_i}$ , we can then define

$$\tilde{\mu} = \mu - \mu|_{C_i} + \|\theta_i\| \delta_{\frac{\theta_i}{\|\theta_i\|}}.$$

535 Thanks to Equation (20), the function  $f_{\tilde{\mu}, a, b}$  still interpolates the data and

$$\|\tilde{\mu}\|_{\text{TV}} \leq \|\mu\|_{\text{TV}} - \|\mu|_{C_i}\|_{\text{TV}} + \|\theta_i\|.$$

536 By minimisation of  $\|\mu\|_{\text{TV}}$ , this is an equality. Moreover as  $\mu$  is a measure on the sphere,

$$\begin{aligned} \|\mu|_{C_i}\|_{\text{TV}} &= \int_{C_i} \|\theta\| d\mu_+(\theta) + \int_{C_i} \|\theta\| d\mu_-(\theta) \\ &\geq \left\| \int_{C_i} \theta d\mu_+(\theta) \right\| + \left\| \int_{C_i} \theta d\mu_-(\theta) \right\| \\ &= \|\alpha_i\| + \|\beta_i\| \geq \|\theta_i\|. \end{aligned}$$

537 By minimisation, all inequalities are equalities. Jensen's case of equality implies for the first inequality  
538 that both  $\mu_+|_{C_i}$  and  $\mu_-|_{C_i}$  are Diracs, while the second inequality implies that either  $\alpha_i = 0$  or  
539  $\beta_i = 0$ . Overall,  $\mu|_{C_i}$  is at most a single Dirac.

540 Now if  $\theta_i \notin \overline{C_i} \cup -\overline{C_i}$ , assume first that  $\langle \theta_i, (x_{i+1}, 1) \rangle > 0$ . This implies  $\langle \theta_i, (x_i, 1) \rangle > 0$  since  
541  $\theta_i \notin \overline{C_i} \cup -\overline{C_i}$ . This then implies that either  $\alpha_i \in \overset{\circ}{C_i}$  or  $\beta_i \in \overset{\circ}{C_i}$ , depending on whether  $i \geq i_0$  or  
542  $i < i_0$ . Assume first that  $\beta_i \in \overset{\circ}{C_i}$  ( $i \geq i_0$ ) and define

$$t = \sup \{ t' \in [0, 1] \mid t' \alpha_i - \beta_i \in -\overline{C_i} \}.$$

543 By continuity,  $t\alpha_i - \beta_i \in -\overline{C_i}$ . Moreover  $0 < t < 1$ , since  $\beta_i \in \overset{\circ}{C_i}$  and  $\theta_i \notin -\overline{C_i}$ . We now define

$$\tilde{\mu} = \mu - \mu|_{C_i} + (1-t)\|\alpha_i\| \delta_{\frac{\alpha_i}{\|\alpha_i\|}} + \|t\alpha_i - \beta_i\| \delta_{\frac{t\alpha_i - \beta_i}{\|t\alpha_i - \beta_i\|}}.$$

544 The function  $f_{\tilde{\mu}, a, b}$  still interpolates the data. Similarly to the case  $\theta_i \in \overline{C_i} \cup -\overline{C_i}$ , the minimisation  
545 of  $\|\mu\|_{\text{TV}}$  implies that  $\mu|_{C_i}$  is at most a single Dirac.

546 If  $\alpha_i \in \overset{\circ}{C_i}$  instead, similar arguments follow defining

$$t = \sup \{ t' \in [0, 1] \mid \alpha_i - t' \beta_i \in \overline{C_i} \}.$$

547 Symmetric arguments also hold if  $\langle \theta_i, (x_{i+1}, 1) \rangle < 0$ . In any case,  $\mu|_{C_i}$  is at most a single Dirac.  
548 This holds for any  $i = 1, \dots, n-1$ , which finally leads to Lemma 1.

## 549 D.2 Proof of Lemma 2

550 Before proving Lemma 2, let us show a one to one mapping from the parameterisation given by  
551 Lemma 1 to a parameterisation given by the sequences of slopes in the points  $x_i$ . Let us define the

552 sets

$$\mathcal{S} = \left\{ (s_1, \dots, s_n) \in \mathbb{R}^n \mid \forall i = 1, \dots, i_0 - 2, s_i \in S_i(s_{i+1}), \right. \\ \left. (s_{i_0-1}, s_{i_0}) \in \Lambda \quad \text{and} \quad \forall i = i_0, \dots, n-1, s_{i+1} \in S_i(s_i) \right\} \quad (21)$$

553 and

$$\mathcal{I} = \left\{ (a, b, (a_i, \tau_i)_{i=1, \dots, n-1}) \mid \forall j = 1, \dots, n, ax_j + b + \sum_{i=1}^{n-1} a_i(x_j - \tau_i)_+ = y_j, \quad \tau_{i_0-1} \in (x_{i_0-1}, x_{i_0}), \right. \\ \left. \tau_i = \frac{x_i + x_{i+1}}{2} \text{ if } a_i = 0, \quad \forall i \in \{1, \dots, i_0 - 2\}, \tau_i \in (x_i, x_{i+1}] \right. \\ \left. \text{and } \forall i \in \{i_0, \dots, n-1\}, \tau_i \in [x_i, x_{i+1}) \right\}.$$

554 The condition  $\tau_i = \frac{x_i + x_{i+1}}{2}$  if  $a_i = 0$  in the definition of  $\mathcal{I}$  is just to avoid redundancy, as any  
555 arbitrary value of  $\tau_i$  would yield the same interpolating function. Lemma 6 below gives a one to one  
556 mapping between these two sets.

557 **Lemma 6.** *The function*

$$\psi : \mathcal{I} \rightarrow \mathcal{S} \\ (a_0, b_0, (a_i, \tau_i)_{i=1, \dots, n-1}) \mapsto (\sum_{j=0}^{i-1} a_j)_{i=1, \dots, n-1}$$

558 *is a one to one mapping. Its inverse is given by*

$$\psi^{-1} : \mathcal{S} \rightarrow \mathcal{I} \\ (s_i)_{i \in [n]} \mapsto (a_0, b_0, (a_i, \tau_i)_{i \in [n-1]})$$

559 *where*

$$a_0 = s_1; \quad b_0 = y_1 - s_1 x_1; \quad a_i = s_{i+1} - s_i \quad \text{for any } i \in [n-1]; \\ \tau_i = \begin{cases} \frac{s_{i+1} - \delta_i}{s_{i+1} - s_i} x_{i+1} + \frac{\delta_i - s_i}{s_{i+1} - s_i} x_i & \text{if } s_{i+1} \neq s_i \\ \frac{x_i + x_{i+1}}{2} & \text{otherwise} \end{cases}.$$

560 *Proof.* For  $(a_0, b_0, (a_i, \tau_i)_{i=1, \dots, n-1}) \in \mathcal{I}$ , let  $f$  be the associated interpolator:

$$f(x) = a_0 x + b_0 + \sum_{i=1}^{n-1} a_i (x - \tau_i)_+$$

561 and let  $(s_i)_{i \in [n]} = \psi(a_0, b_0, (a_i, \tau_i)_i)$ . Given the definition of  $\psi$ , it is straightforward to check that  
562  $s_i$  corresponds to the left (resp. right) derivative of  $f$  at  $x_i \geq 0$  (resp.  $x_i < 0$ ). We actually have the  
563 two following inequalities linking the parameters  $(a_0, b_0, (a_i, \tau_i)_i)$  and  $(s_i)_i$  for any  $i \in [n-1]$ :

$$s_i + a_i = s_{i+1}, \\ y_i + s_i(x_{i+1} - x_i) + a_i(x_{i+1} - \tau_i) = y_{i+1}.$$

564 The first equality comes from the (left or right) derivatives of  $f$  in  $x_i$ , while the second equality is  
565 due to the interpolation of the data by  $f$ . These two equalities imply that an interpolator with ReLU  
566 parameters in  $\mathcal{I}$  (i.e.,  $f$ ) can be equivalently described by its (left or right) derivatives in each  $x_i$ . A  
567 straightforward computation then allows to show that  $\psi$  and  $\psi^{-1}$  are well defined and indeed verify  
568  $\psi \circ \psi^{-1} = I_{\mathcal{S}}$  and  $\psi^{-1} \circ \psi = I_{\mathcal{I}}$ .  $\square$

569 Using this bijection from  $\mathcal{I}$  to  $\mathcal{S}$ , we can now prove Lemma 2. Note for the remaining of the proof

570  $\alpha = \min_{\forall i \in [n], f(x_i) = y_i} \int_{\mathbb{R}} \sqrt{1 + x^2} d|f''(x)|$ . Thanks to Lemma 1, we have the first equivalence:

$$\alpha = \min_{(a_0, b_0, (a_i, \tau_i)_{i=1, \dots, n-1}) \in \mathcal{I}} \sum_{i=1}^{n-1} |a_i| \sqrt{1 + \tau_i^2}.$$

571 For any  $(a_0, b_0, (a_i, \tau_i)_{i=1, \dots, n-1}) \in \mathcal{I}$ , we can define thanks to Lemma 6  $(s_i)_i =$   
572  $\psi(a_0, b_0, (a_i, \tau_i)_i) \in \mathcal{S}$ . We then have  $(a_0, b_0, (a_i, \tau_i)_i) = \psi^{-1}((s_i)_i)$ . Moreover, by definition

573 of  $\psi^{-1}$ , we can easily check that

$$\begin{aligned} |a_i| \sqrt{1 + \tau_i^2} &= \sqrt{a_i^2 + (a_i \tau_i)^2} \\ &= \sqrt{(s_{i+1} - s_i)^2 + ((s_{i+1} - \delta_i)x_{i+1} + (s_i - \delta_i)x_i)^2} \\ &= g_{i+1}(s_{i+1}, s_i). \end{aligned} \quad (22)$$

574 As  $\psi$  is a one to one mapping, we have for any function  $h$  the equivalence  $\min_{u \in \psi^{-1}(\mathcal{S})} h(u) =$   
 575  $\min_{s \in \mathcal{S}} h(\psi^{-1}(s))$ . In particular, thanks to Equation (22):

$$\min_{(a_0, b_0, (a_i, \tau_i)_{i=1, \dots, n-1}) \in \mathcal{I}} \sum_{i=1}^{n-1} |a_i| \sqrt{1 + \tau_i^2} = \min_{(s_i)_i \in \mathcal{S}} \sum_{i=1}^{n-1} g_{i+1}(s_{i+1}, s_i). \quad (23)$$

576 From there, define for any  $i \geq i_0$ ,

$$d_i(s_i) = \min_{\substack{(\tilde{s})_j \in \mathcal{S} \\ \text{s.t. } \tilde{s}_i = s_i}} \sum_{j=i}^{n-1} g_{j+1}(\tilde{s}_{j+1}, \tilde{s}_j);$$

577 and for any  $i < i_0$

$$d_i(s_i) = \min_{\substack{(\tilde{s})_j \in \mathcal{S} \\ \text{s.t. } \tilde{s}_i = s_i}} \sum_{j=1}^{i-1} g_{j+1}(\tilde{s}_{j+1}, \tilde{s}_j).$$

578 Obviously, we have from Equation (23) and the definition of  $\mathcal{S}$  that

$$\alpha = \min_{(s_{i_0-1}, s_{i_0}) \in \Lambda} g_{i_0}(s_{i_0}, s_{i_0-1}) + d_{i_0-1}(s_{i_0-1}) + d_{i_0}(s_{i_0}). \quad (24)$$

579 It now remains to show by induction that for any  $i$  that  $c_i = d_i$ . This is obviously the case for  $i = n$ .

580 Let us now consider  $i \in \{i_0, \dots, n-1\}$ . The definition of  $d_i$  leads to

$$\begin{aligned} d_i(s_i) &= \min_{\substack{(\tilde{s})_j \in \mathcal{S} \\ \text{s.t. } \tilde{s}_i = s_i}} \sum_{j=i}^{n-1} g_{j+1}(\tilde{s}_{j+1}, \tilde{s}_j) \\ &= \min_{s_{i+1} \in S_i(s_i)} \min_{\substack{(\tilde{s})_j \in \mathcal{S} \\ \text{s.t. } \tilde{s}_i = s_i \\ \tilde{s}_{i+1} = s_{i+1}}} g_{i+1}(s_{i+1}, s_i) + \sum_{j=i+1}^{n-1} g_{j+1}(\tilde{s}_{j+1}, \tilde{s}_j) \\ &= \min_{s_{i+1} \in S_i(s_i)} g_{i+1}(s_{i+1}, s_i) + \min_{\substack{(\tilde{s})_j \in \mathcal{S} \\ \text{s.t. } \tilde{s}_i = s_i \\ \tilde{s}_{i+1} = s_{i+1}}} \sum_{j=i+1}^{n-1} g_{j+1}(\tilde{s}_{j+1}, \tilde{s}_j). \end{aligned} \quad (25)$$

581 Now note that for any  $s_{i+1} \in S_i(s_i)$ , we have the equality of the sets

$$\{(\tilde{s}_j)_{j \geq i+1} \mid (\tilde{s})_{j \in [n-1]} \in \mathcal{S} \text{ s.t. } \tilde{s}_i = s_i \text{ and } \tilde{s}_{i+1} = s_{i+1}\} = \{(\tilde{s}_j)_{j \geq i+1} \mid (\tilde{s})_{j \in [n-1]} \in \mathcal{S} \text{ s.t. } \tilde{s}_{i+1} = s_{i+1}\}$$

582 Since the last term in Equation (25) only depends on  $(\tilde{s}_j)_{j \geq i+1}$ , this implies that

$$\begin{aligned} d_i(s_i) &= \min_{s_{i+1} \in S_i(s_i)} g_{i+1}(s_{i+1}, s_i) + \min_{\substack{(\tilde{s})_j \in \mathcal{S} \\ \text{s.t. } \tilde{s}_{i+1} = s_{i+1}}} \sum_{j=i+1}^{n-1} g_{j+1}(\tilde{s}_{j+1}, \tilde{s}_j) \\ &= \min_{s_{i+1} \in S_i(s_i)} g_{i+1}(s_{i+1}, s_i) + d_{i+1}(s_{i+1}). \end{aligned}$$

583 By induction, it naturally comes from the definition of  $c_i$  that  $c_i = d_i$  for any  $i \geq i_0$ . Symmetric  
 584 arguments hold for any  $i < i_0$ , which finally gives  $c_i = d_i$  for any  $i \in [n]$ . Equation (24) then yields  
 585 Lemma 2.

## E Proof of Section 5

The proofs of this section are shown in the case where  $x_1 < 0$  and  $x_n \geq 0$ . When all the  $x$  are positive, i.e.,  $x_1 \geq 0$ , the adapted version of Lemma 2 would yield for  $i_0 = 1$  the equivalence<sup>8</sup>

$$\min_{\substack{f \\ \forall i \in [n], f(x_i) = y_i}} \int_{\mathbb{R}} \sqrt{1+x^2} d|f''(x)| = \min_{s_{i_0} \in \mathbb{R}} c_{i_0}(s_{i_0}).$$

The proofs of Appendix E can then be easily adapted to this case (and similarly if  $x_n < 0$ ). Appendix E.5 at the end of the section more precisely states how to adapt them to this case.

### E.1 Proof of Theorem 2

Before proving Theorem 2, Lemma 7 below provides important properties verified by the functions  $c_i$  defined in Equation (7).

**Lemma 7.** *For each  $i \in \{i_0, \dots, n-1\}$ , the function  $c_i$  is convex,  $\sqrt{1+x_i^2}$ -Lipschitz on  $\mathbb{R}$  and minimised for  $s_i = \delta_i$ .  
Moreover, on both intervals  $(-\infty, \delta_i]$  and  $[\delta_i, +\infty)$ :*

1. *either  $c_i(s_i) = \sqrt{1+x_i^2}|s_i - \delta_i| + c_{i+1}(\delta_i)$  for all  $s_i$  in the considered interval, or  $c_i$  is strictly convex on the considered interval;*
2.  *$|c_i(s_i) - c_i(s'_i)| \geq \frac{1+x_i x_{i+1}}{\sqrt{1+x_{i+1}^2}} |s_i - s'_i|$  for all  $s_i, s'_i$  in the considered interval.*

Similarly, for each  $i \in \{1, \dots, i_0-2\}$ , the function  $c_{i+1}$  is convex,  $\sqrt{1+x_{i+1}^2}$ -Lipschitz on  $\mathbb{R}$  and minimised for  $s_{i+1} = \delta_i$ .  
Moreover, on both intervals  $(-\infty, \delta_i]$  and  $[\delta_i, +\infty)$ :

1. *either  $c_{i+1}(s_{i+1}) = \sqrt{1+x_{i+1}^2}|s_{i+1} - \delta_i| + c_i(\delta_i)$  for all  $s_{i+1}$  in the considered interval, or  $c_{i+1}$  is strictly convex on the considered interval;*
2.  *$|c_{i+1}(s_{i+1}) - c_{i+1}(s'_{i+1})| \geq \frac{1+x_i x_{i+1}}{\sqrt{1+x_i^2}} |s_{i+1} - s'_{i+1}|$  for all  $s_{i+1}, s'_{i+1}$  in the considered interval.*

*Proof.* For any  $i \in \{1, \dots, i_0-2\}$ , we prove the result by (backward) induction. Since  $c_n = 0$ , a straightforward calculation gives<sup>9</sup>

$$c_{n-1}(s_{n-1}) = \sqrt{1+x_{n-1}^2} |s_{n-1} - \delta_{n-1}|,$$

which gives the wanted properties for  $i = n-1$ .

Now consider  $i \in \{i_0, \dots, n-2\}$  such that  $c_{i+1}$  verifies all the properties in the first part of Lemma 7. We first show the Lipschitz property of  $c_i$ . Let  $s_i, s'_i < \delta_i$  first. By inductive assumption, the function  $s_{i+1} \mapsto g_{i+1}(s_{i+1}, s_i) + c_{i+1}(s_{i+1})$  reaches a minimum on  $[\delta_i, +\infty)$ . Consider  $s_{i+1} \geq \delta_i$  such that

$$c_i(s_i) = g_{i+1}(s_{i+1}, s_i) + c_{i+1}(s_{i+1}).$$

Also by minimisation,  $c_i(s'_i) \leq g_{i+1}(s_{i+1}, s'_i) + c_{i+1}(s_{i+1})$ . For the vectors  $u = (x_{i+1}, 1)$  and  $v = (x_i, 1)$ , it then holds:

$$\begin{aligned} c_i(s'_i) - c_i(s_i) &\leq g_{i+1}(s_{i+1}, s'_i) - g_{i+1}(s_{i+1}, s_i) \\ &= \|(s_{i+1} - \delta_i)u - (s'_i - \delta_i)v\| - \|(s_{i+1} - \delta_i)u - (s_i - \delta_i)v\| \\ &\leq \|(s_i - s'_i)v\| = \sqrt{1+x_i^2} |s_i - s'_i|. \end{aligned}$$

The first equality comes from the definition of  $g_{i+1}$  as a norm and the second inequality comes from the triangle inequality. By symmetry, we showed  $|c_i(s'_i) - c_i(s_i)| \leq \sqrt{1+x_i^2} |s_i - s'_i|$  for  $s_i, s'_i < \delta_i$ .

<sup>8</sup>Note that in that case  $c_1 \neq 0$ . Instead,  $c_1$  is defined through the recursion given in Equation (7).

<sup>9</sup>This calculation uses the fact that both  $x_{n-1}$  and  $x_n$  are positive, which implies that the minimal  $s_n$  in the definition of  $c_{n-1}$  is  $\delta_{n-1}$ .

617 Note that if  $s_i = \delta_i$ , then  $s_{i+1} = \delta_i$  and we show similarly that  $c_i(s'_i) - c_i(\delta_i) \leq \sqrt{1 + x_i^2}|\delta_i - s'_i|$ .  
 618 Moreover,

$$\begin{aligned} c_i(s'_i) - c_i(\delta_i) &= \min_{s'_{i+1} \geq \delta_i} \|(s'_{i+1} - \delta_i)u - (s'_i - \delta_i)v\| + c_{i+1}(s'_{i+1}) - c_{i+1}(\delta_i) \\ &\geq \min_{s'_{i+1} \geq \delta_i} \|(s'_{i+1} - \delta_i)u - (s'_i - \delta_i)v\| - \|(s'_{i+1} - \delta_i)u\| \\ &\geq 0. \end{aligned}$$

619 The first inequality comes from the Lipschitz property of  $c_{i+1}$ . The second from the fact that  
 620  $(s'_{i+1} - \delta_i)u$  and  $(s'_i - \delta_i)v$  are negatively correlated, since  $x_i$  and  $x_{i+1}$  are both positive. As a  
 621 consequence,  $c_i$  is  $\sqrt{1 + x_i^2}$ -Lipschitz on  $(-\infty, \delta_i]$ . Symmetrically, it is also  $\sqrt{1 + x_i^2}$ -Lipschitz on  
 622  $[\delta_i, +\infty)$ , which finally implies it is  $\sqrt{1 + x_i^2}$ -Lipschitz on  $\mathbb{R}$ . Moreover, the last calculation also  
 623 shows that  $c_i$  is minimised for  $s_i = \delta_i$ .

624 Let us now show that  $c_i$  verifies the first point on  $(-\infty, \delta_i]$ . By continuity, we only have to show it  
 625 on  $(-\infty, \delta_i)$ . Let  $s_i \in (-\infty, \delta_i)$ , we then have by definition

$$c_i(s_i) = \min_{s_{i+1} \geq \delta_i} g_{i+1}(s_{i+1}, s_i) + c_{i+1}(s_{i+1}).$$

626 If  $\delta_{i+1} \leq \delta_i$ , note that both functions  $g_{i+1}(\cdot, s_i)$  and  $c_{i+1}$  are increasing on  $[\delta_i, +\infty)$ <sup>10</sup>. The minimum  
 627 is thus reached for  $s_{i+1} = \delta_i$  and

$$c_i(s_i) = \sqrt{1 + x_i^2}|s_i - \delta_i| + c_{i+1}(\delta_i).$$

628 If  $\delta_{i+1} > \delta_i$ , both functions  $g_{i+1}(\cdot, s_i)$  and  $c_{i+1}$  are increasing on  $[\delta_{i+1}, +\infty)$ . As a consequence,  
 629 we can then rewrite

$$c_i(s_i) = \min_{s_{i+1} \in [\delta_i, \delta_{i+1}]} g_{i+1}(s_{i+1}, s_i) + c_{i+1}(s_{i+1}). \quad (26)$$

630 Assume first that  $c_{i+1}(s_{i+1}) = \sqrt{1 + x_{i+1}^2}|s_{i+1} - \delta_{i+1}| + c_{i+2}(\delta_{i+1})$  on  $[\delta_i, \delta_{i+1}]$ . By triangle  
 631 inequality, we actually have

$$g_{i+1}(s_{i+1}, s_i) \geq g_{i+1}(\delta_{i+1}, s_i) - \sqrt{1 + x_{i+1}^2}|\delta_{i+1} - s_{i+1}|.$$

632 This leads for  $s_{i+1} \in [\delta_i, \delta_{i+1}]$  to

$$g_{i+1}(s_{i+1}, s_i) + c_{i+1}(s_{i+1}) \geq g_{i+1}(\delta_{i+1}, s_i) + c_{i+2}(\delta_{i+1}).$$

633 The minimum in Equation (26) is thus reached for  $s_{i+1} = \delta_{i+1}$ , which finally gives for any  $s_i \leq \delta_i$

$$c_i(s_i) = g_{i+1}(\delta_{i+1}, s_i) + c_{i+2}(\delta_{i+1}).$$

634 Since  $\delta_{i+1} > \delta_i$ , it is easy to check that  $g_{i+1}(\delta_{i+1}, \cdot)$  is strictly convex on  $(-\infty, \delta_i)$  and so is  $c_i$ .

635 Let us now assume the last case, where  $c_{i+1}$  is strictly convex on  $[\delta_i, \delta_{i+1}]$ . By contradiction, assume  
 636 that the first point on  $(-\infty, \delta_i]$  does not hold. Note in the following  $h(s_{i+1}, s_i) = g_{i+1}(s_{i+1}, s_i) +$   
 637  $c_{i+1}(s_{i+1})$ . For  $s_i, s'_i < \delta_i$ , by continuity of  $h$ , let  $s_{i+1}, s'_{i+1} \in [\delta_i, \delta_{i+1}]$  be such that

$$c_i(s_i) = h(s_{i+1}, s_i) \quad \text{and} \quad c_i(s'_i) = h(s'_{i+1}, s'_i).$$

638 For any  $t \in (0, 1)$ , by convexity of  $h$ :

$$\begin{aligned} c_i(ts_i + (1-t)s'_i) &\leq h(t(s_{i+1}, s_i) + (1-t)(s'_{i+1}, s'_i)) \\ &\leq th(s_{i+1}, s_i) + (1-t)h(s'_{i+1}, s'_i) \\ &= tc_i(s_i) + (1-t)c_i(s'_i). \end{aligned}$$

639  $c_i$  is thus convex on  $(-\infty, \delta_i]$ . Moreover, the case of equality corresponds to the case of equality for  
 640 both  $g_{i+1}$  and  $c_{i+1}$ :

$$\begin{aligned} g_{i+1}(t(s_{i+1}, s_i) + (1-t)(s'_{i+1}, s'_i)) &= tg_{i+1}(s_{i+1}, s_i) + (1-t)g_{i+1}(s'_{i+1}, s'_i) \\ c_{i+1}(ts_{i+1} + (1-t)s'_{i+1}) &= tc_{i+1}(s_{i+1}) + (1-t)c_{i+1}(s'_{i+1}). \end{aligned}$$

641 The former leads to the colinearity of the vectors  $(s_{i+1} - \delta_i, s_i - \delta_i)$  and  $(s'_{i+1} - \delta_i, s'_i - \delta_i)$ ; the  
 642 latter gives  $s_{i+1} = s'_{i+1}$  by strict convexity of  $c_{i+1}$ . Two cases are then possible

$$\begin{cases} \text{either } s_{i+1} = \delta_i = s'_{i+1} \\ \text{or } s_i = s'_i. \end{cases}$$

<sup>10</sup>Here again, we use the fact that  $x_i$  and  $x_{i+1}$  are positive.

643 The former case then implies that  $c_i(s_i) = \sqrt{1+x_i^2}|s_i - \delta_i| + c_{i+1}(\delta_i)$ . Since  $c_i(\delta_i) = c_{i+1}(\delta_i)$ ,  $c_i$   
644 is  $\sqrt{1+x_i^2}$ -Lipschitz and convex on  $(-\infty, \delta_i]$ , this leads to  $c_i(s) = \sqrt{1+x_i^2}|s - \delta_i| + c_{i+1}(\delta_i)$  for  
645 any  $s \in (-\infty, \delta_i]$ . This contradicts the assumption that the first point does not hold on  $(-\infty, \delta_i]$ . Nec-  
646 essarily, we have  $s_i = s'_i$ . So  $c_i$  is strictly convex on  $(-\infty, \delta_i]$ , which leads to another contradiction:  
647 the first point does hold on  $(-\infty, \delta_i]$ .

648 Finally, we just showed that in any case,  $c_i$  is either strictly convex or equal to  $s_i \mapsto \sqrt{1+x_i^2}|s_i - \delta_i|$   
649 on  $(-\infty, \delta_i]$ . Symmetric arguments yield the same on  $[\delta_i, +\infty)$ .  $c_i$  is thus minimised in  $\delta_i$ ,  $\sqrt{1+x_i^2}$ -  
650 Lipschitz and verifies the first point on both intervals  $(-\infty, \delta_i]$  and  $[\delta_i, +\infty)$ . This directly implies  
651 that  $c_i$  is convex on  $\mathbb{R}$ .

652 It now remains to show the second point on the two intervals. Let us show it on  $(-\infty, \delta_i]$ : on  
653  $(-\infty, \delta_i)$  is actually sufficient by continuity. Consider  $s_i < s'_i < \delta_i$  and  $s_{i+1} \in [\delta_i, +\infty)$  such that

$$c_i(s_i) = g_{i+1}(s_{i+1}, s_i) + c_{i+1}(s_{i+1}).$$

654 By definition of  $c_i$ ,

$$c_i(s_i) - c_i(s'_i) \geq g_{i+1}(s_{i+1}, s_i) - g_{i+1}(s_{i+1}, s'_i).$$

655 Straightforward computations yield that the function

$$h_2 : \begin{aligned} &(-\infty, \delta_i] \rightarrow \mathbb{R}_+ \\ &s \mapsto g_{i+1}(s_{i+1}, s) \end{aligned}$$

656 is convex and  $h'_2(\delta_i) = -\frac{1+x_i x_{i+1}}{\sqrt{1+x_{i+1}^2}}$ . Thus,  $h'_2 \leq -\frac{1+x_i x_{i+1}}{\sqrt{1+x_{i+1}^2}}$ , which finally implies

$$\begin{aligned} c_i(s_i) - c_i(s'_i) &\geq h(s_i) - h(s'_i) \\ &\geq \frac{1+x_i x_{i+1}}{\sqrt{1+x_{i+1}^2}}(s'_i - s_i). \end{aligned}$$

657 The second point is thus verified on  $(-\infty, \delta_i)$  and on  $(-\infty, \delta_i]$  by continuity. Symmetric arguments  
658 lead to the same property on  $[\delta_i, +\infty)$ .

659 By induction, this implies the first part of Lemma 7. Symmetric arguments lead to the second part of  
660 Lemma 7 for  $i \leq i_0 - 2$ .  $\square$

661 We can now prove Theorem 2. Following the proof of Lemma 2, there is a unique minimiser of  
662 Equation (3) if and only if the following problem admits a unique minimiser:

$$\min_{\mathbf{s} \in \mathcal{S}} \sum_{i=1}^{n-1} g_{i+1}(s_{i+1}, s_i). \quad (27)$$

663 We already know that the minimum is attained thanks to Lemma 1. By construction of the functions  
664  $c_i$ , any minimum  $\tilde{\mathbf{s}}$  of Equation (27) verifies

$$\tilde{s}_i \in \underset{s_i \in S_i(\tilde{s}_{i+1})}{\operatorname{argmin}} g_{i+1}(\tilde{s}_{i+1}, s_i) + c_i(s_i) \quad \text{for any } i \in [i_0 - 2] \quad (28)$$

$$(\tilde{s}_{i_0-1}, \tilde{s}_{i_0}) \in \underset{(s_{i_0-1}, s_{i_0}) \in \Lambda}{\operatorname{argmin}} g_{i_0}(s_{i_0}, s_{i_0-1}) + c_{i_0-1}(s_{i_0-1}) + c_{i_0}(s_{i_0}) \quad (29)$$

$$\tilde{s}_{i+1} \in \underset{s_{i+1} \in S_i(\tilde{s}_i)}{\operatorname{argmin}} g_{i+1}(s_{i+1}, \tilde{s}_i) + c_{i+1}(s_{i+1}) \quad \text{for any } i \in \{i_0, \dots, n-1\}$$

665 It now remains to show that all these problems admit unique minimisers. First assume Equation (29)  
666 admits different minimisers  $(s_{i_0-1}, s_{i_0})$  and  $(s'_{i_0-1}, s'_{i_0})$ . Note in the following  $h_{i_0-1} : (s, s') \mapsto$   
667  $g_{i_0}(s, s') + c_{i_0-1}(s') + c_{i_0}(s)$ . By minimisation and convexity of the three functions  $g_{i_0}$ ,  $c_{i_0-1}$ ,  $c_{i_0}$ ,  
668 for any  $t \in (0, 1)$ :

$$h_{i_0-1}(t(s_{i_0-1}, s_{i_0}) + (1-t)(s'_{i_0-1}, s'_{i_0})) \leq t h_{i_0-1}(s_{i_0-1}, s_{i_0}) + (1-t) h_{i_0-1}(s'_{i_0-1}, s'_{i_0}) \quad (30)$$

$$= h_{i_0-1}(s_{i_0-1}, s_{i_0}). \quad (31)$$

669 The whole segment joining  $(s_{i_0-1}, s_{i_0})$  and  $(s'_{i_0-1}, s'_{i_0})$  is then a minimiser. Without loss of gener-  
670 ality, we can thus assume that both  $s_{i_0}$  and  $s'_{i_0-1}$  are on the same side of  $\delta_{i_0-1}$  (e.g. smaller than  
671  $\delta_{i_0-1}$ ) and both  $s_{i_0}$  and  $s'_{i_0}$  are on the same side of  $\delta_{i_0}$ .

672 Moreover, Equation (31) implies an equality on  $g_{i_0}$  that leads to the colinearity of the vectors  
673  $(s_{i_0-1} - \delta_{i_0-1}, s_{i_0} - \delta_{i_0-1})$  and  $(s'_{i_0-1} - \delta_{i_0-1}, s'_{i_0} - \delta_{i_0-1})$ . In particular, both  $s_{i_0} \neq s'_{i_0}$  and

674  $s_{i_0-1} \neq s'_{i_0-1}$ . Moreover, we have equality cases on both  $c_{i_0-1}$  and  $c_{i_0}$  implying, thanks to the first  
 675 point of Lemma 7

$$\begin{aligned} |c_{i_0-1}(s_{i_0-1}) - c_{i_0-1}(s'_{i_0-1})| &= \sqrt{1 + x_{i_0-1}^2} |s_{i_0-1} - s'_{i_0-1}| \\ |c_{i_0}(s_{i_0}) - c_{i_0}(s'_{i_0})| &= \sqrt{1 + x_{i_0}^2} |s_{i_0} - s'_{i_0}|. \end{aligned} \quad (32)$$

676 For  $u = (x_{i_0-1}, 1)$  and  $v = (x_{i_0}, 1)$ , we have by (positive) colinearity of  $(s_{i_0-1} - \delta_{i_0-1}, s_{i_0} - \delta_{i_0-1})$   
 677 and  $(s'_{i_0-1} - \delta_{i_0-1}, s'_{i_0} - \delta_{i_0-1})$ :

$$\begin{aligned} |g_{i_0}(s_{i_0}, s_{i_0-1}) - g_{i_0}(s'_{i_0}, s'_{i_0-1})| &= \| (s_{i_0} - \delta_{i_0-1})v - (s_{i_0-1} - \delta_{i_0-1})u \| - \| (s'_{i_0} - \delta_{i_0-1})v - (s'_{i_0-1} - \delta_{i_0-1})u \| \\ &= \| (s_{i_0} - s'_{i_0})v - (s_{i_0-1} - s'_{i_0-1})u \|. \end{aligned}$$

678 Since  $s_{i_0} \neq s'_{i_0}$  and  $s_{i_0-1} \neq s'_{i_0-1}$ , the triangle inequality gives both strict inequalities

$$\begin{aligned} \left| \sqrt{1 + x_{i_0}^2} |s_{i_0} - s'_{i_0}| - \sqrt{1 + x_{i_0-1}^2} |s_{i_0-1} - s'_{i_0-1}| \right| &< |g_{i_0}(s_{i_0}, s_{i_0-1}) - g_{i_0}(s'_{i_0}, s'_{i_0-1})|, \\ \sqrt{1 + x_{i_0}^2} |s_{i_0} - s'_{i_0}| + \sqrt{1 + x_{i_0-1}^2} |s_{i_0-1} - s'_{i_0-1}| &> |g_{i_0}(s_{i_0}, s_{i_0-1}) - g_{i_0}(s'_{i_0}, s'_{i_0-1})|. \end{aligned}$$

679 Using this with Equation (32), this yields

$$g_{i_0}(s_{i_0}, s_{i_0-1}) - g_{i_0}(s'_{i_0}, s'_{i_0-1}) \neq c_{i_0}(s_{i_0}) - c_{i_0}(s'_{i_0}) + c_{i_0-1}(s_{i_0-1}) - c_{i_0-1}(s'_{i_0-1}).$$

680 This contradicts the fact that  $(s_{i_0-1}, s_{i_0})$  and  $(s'_{i_0-1}, s'_{i_0})$  both minimise Equation (29). Hence,  
 681 Equation (29) admits a unique minimiser.

682 Also the minimisation problem

$$\min_{s_{i+1} \in S_i(\tilde{s}_i)} g_{i+1}(s_{i+1}, \tilde{s}_i) + c_{i+1}(s_{i+1})$$

683 admits a unique minimiser for any  $i \in \{i_0, \dots, n-1\}$ . Indeed, either  $\tilde{s}_i = \delta_i$  in which case the  
 684 constraint set is a singleton, or the function  $s_{i+1} \mapsto g_{i+1}(s_{i+1}, \tilde{s}_i)$  is strictly convex for  $\tilde{s}_i \neq \delta_i$ . A  
 685 symmetric argument exists for the minimisation problem of Equation (26). It thus concludes the  
 686 proof of Theorem 2.

## 687 E.2 Proof of Lemma 3

688 Let  $i \in \{i_0, \dots, n-1\}$ . Recall that

$$s_{i+1}^* = \operatorname{argmin}_{s_{i+1} \in S_i(s_i^*)} g_{i+1}(s_{i+1}, s_i^*) + c_{i+1}(s_{i+1}).$$

689 If  $i = n-1$ , the objective is obviously minimised for  $s_n^* = \delta_{n-1}$  as both  $x_{n-1}$  and  $x_n$  are positive.  
 690 Otherwise, assume for example that  $s_i^* > \delta_i$ . Thanks to Lemma 7, the objective is decreasing  
 691 on  $(-\infty, \min(\delta_i, \delta_{i+1}))$  and  $S_i(s_i^*) = [\delta_i, +\infty)$  which yields that  $s_{i+1}^* \in [\min(\delta_i, \delta_{i+1}), \delta_i] \subset$   
 692  $[\min(\delta_i, \delta_{i+1}), \max(\delta_i, \delta_{i+1})]$ . The case  $s_i^* = \delta_i$  is trivial and similar arguments hold for  $s_i^* < \delta_i$ .

693 Now consider  $i = i_0 - 1$ . Assume first that  $s_{i_0-1}^* > \delta_{i_0-1}$ , then

$$s_{i_0}^* = \operatorname{argmin}_{s_{i_0} < \delta_{i_0-1}} g_{i_0}(s_{i_0}, s_{i_0-1}^*) + c_{i_0}(s_{i_0}).$$

694 Thanks to the last point of Lemma 7

$$c_{i_0}(s_{i_0}) - c_{i_0}(s'_{i_0}) \geq \frac{1 + x_{i_0} x_{i_0+1}}{\sqrt{1 + x_{i_0+1}^2}} (s_{i_0} - s'_{i_0}) \quad \text{for any } s_{i_0} < s'_{i_0} \leq \delta_{i_0}. \quad (33)$$

695 Note that the function

$$\begin{aligned} h : (-\infty, \delta_{i_0-1}] &\rightarrow \mathbb{R}_+ \\ s &\mapsto g_{i_0}(s, s_{i_0-1}^*) \end{aligned}$$

696 is convex and verifies  $h'(\delta_{i_0-1}) = -\frac{1 + x_{i_0-1} x_{i_0}}{\sqrt{1 + x_{i_0-1}^2}}$ . Since  $x_{i_0-1} < 0 \leq x_{i_0+1}$ , it comes

$$-\frac{1 + x_{i_0-1} x_{i_0}}{\sqrt{1 + x_{i_0-1}^2}} \leq x_{i_0} \leq \frac{1 + x_{i_0} x_{i_0+1}}{\sqrt{1 + x_{i_0+1}^2}}.$$

697 Thanks to Equation (33), the function  $s_{i_0} \mapsto g_{i_0}(s_{i_0}, s_{i_0-1}^*) + c_{i_0}(s_{i_0})$  is thus decreasing on  
 698  $(-\infty, \min(\delta_{i_0-1}, \delta_{i_0}))$ . As above, this implies that  $s_{i_0}^* \in [\min(\delta_{i_0-1}, \delta_{i_0}), \max(\delta_{i_0-1}, \delta_{i_0})]$ . The  
 699 case  $s_{i_0-1}^* = \delta_{i_0-1}$  is trivial and similar arguments hold if  $s_{i_0-1}^* < \delta_{i_0-1}$ .



700 We showed  $s_{i+1}^* \in [\min(\delta_i, \delta_{i+1}), \max(\delta_i, \delta_{i+1})]$  for any  $i \in \{i_0, \dots, n\}$ . Symmetric arguments  
 701 hold for  $i \in [i_0 - 1]$ . This concludes the proof of Lemma 3.

### 702 E.3 Proof of Lemma 4

703 Let us first prove that any sparsest interpolator  $f$  has at least a number of kinks given by the right  
 704 sum. For that, we actually show that for  $k \geq 1$ , on any interval  $(x_{n_k-1}, x_{n_k+1})$  with  $\delta_{n_k-1} \neq \delta_{n_k}$ ,  
 705  $f$  has at least  $\left\lceil \frac{n_{k+1} - n_k}{2} \right\rceil$  kinks, whose signs are given by  $\text{sign}(\delta_{n_k} - \delta_{n_k-1})$ . Consider any  $k \geq 1$   
 706 such that  $\delta_{n_k-1} \neq \delta_{n_k}$ . Assume w.l.o.g. that  $\delta_{n_k-1} < \delta_{n_k}$ . By the definition of Equation (9):

$$\delta_j > \delta_{j-1} \quad \text{for any } j \in \{n_k, \dots, n_{k+1} - 1\}.$$

707 Obviously,  $f$  must count at least one positive kink on each interval of the form<sup>11</sup>  $(x_{j-1}, x_{j+1})$  for  
 708 any  $n_k \leq j \leq n_{k+1} - 1$ . Note that we can build  $\left\lceil \frac{n_{k+1} - n_k}{2} \right\rceil$  disjoint such intervals. Thus,  $f$  has at  
 709 least  $\left\lceil \frac{n_{k+1} - n_k}{2} \right\rceil$  positive kinks on  $(x_{n_k-1}, x_{n_k+1})$ .

710 The intervals of the form  $(x_{n_k-1}, x_{n_k+1})$  with  $\delta_{n_k-1} < \delta_{n_k}$  are disjoint by definition. As a conse-  
 711 quence,  $f$  has a total number of positive kinks at least

$$\sum_{k \geq 1} \left\lceil \frac{n_{k+1} - n_k}{2} \right\rceil \mathbb{1}_{\delta_{n_k-1} < \delta_{n_k}}.$$

712 Similarly,  $f$  has a total number of negative kinks at least

$$\sum_{k \geq 1} \left\lceil \frac{n_{k+1} - n_k}{2} \right\rceil \mathbb{1}_{\delta_{n_k-1} > \delta_{n_k}},$$

713 which leads to the first part of Lemma 4

$$\min_{\substack{f \\ \forall i, f(x_i) = y_i}} \|f''\|_0 \geq \sum_{k \geq 1} \left\lceil \frac{n_{k+1} - n_k}{2} \right\rceil \mathbb{1}_{\delta_{n_k-1} \neq \delta_{n_k}}.$$

714 We now construct an interpolating function that has exactly the desired number of kinks. Note that  
 715 the problem considered in Lemma 4 is shift invariant (which is not the case of Equation (3)). As a  
 716 consequence, we can assume without loss of generality that  $x_1 \geq 0$ . This simplifies the definition of  
 717 the following sequence of slopes  $s \in S$ :

$$s_1 = \delta_1$$

$$\text{and for any } i \in \{2, \dots, n\}, \quad s_i = \begin{cases} \delta_{i-1} & \text{if } (s_{i-1} = \delta_{i-1} \text{ or } i = n_k \text{ for some } k \geq 1) \\ s_i = \delta_i & \text{otherwise.} \end{cases}$$

718 It is easy to check that  $s \in S$ . We now consider the function  $f$  associated to the sequence of  
 719 slopes by the mapping of Lemma 6 and an interval  $[x_{n_k-1}, x_{n_k+1})$  with  $\delta_{n_k-1} \neq \delta_{n_k}$ . By definition,  
 720  $s_{n_k+1+2p} = \delta_{n_k+1+2p}$  for any  $p$  such that  $n_k + 1 \leq n_k + 1 + 2p < n_{k+1}$ . This implies that  $f$  has no  
 721 kink in the interval  $[x_{n_k+1+2p}, x_{n_k+2+2p})$ . From there, a simple calculation shows that  $f$  has at most  
 722  $\left\lceil \frac{n_{k+1} - n_k}{2} \right\rceil$  kinks on  $[x_{n_k}, x_{n_k+1})$ . Moreover, as  $s_i = \delta_{i-1}$  if  $i = n_k$ ,  $f$  has no kink on intervals  
 723  $[x_{n_k}, x_{n_k+1})$  when  $\delta_{n_k-1} = \delta_{n_k}$ .  $f$  is thus an interpolating function with at most

$$\sum_{k \geq 1} \left\lceil \frac{n_{k+1} - n_k}{2} \right\rceil \mathbb{1}_{\delta_{n_k-1} \neq \delta_{n_k}},$$

724 kinks, which concludes the proof of Lemma 4.

### 725 E.4 Proof of Theorem 3

726 Let  $f$  be the minimiser of Equation (3). The proof of Theorem 3 separately shows that  $f$  has exactly  
 727  $\left\lceil \frac{n_{k+1} - n_k}{2} \right\rceil \mathbb{1}_{\delta_{n_k-1} \neq \delta_{n_k}}$  kinks on each  $(x_{n_k-1}, x_{n_k+1})$ . Fix in the following  $k \geq 0$ .

<sup>11</sup>Otherwise, the derivative would be weakly decreasing on the interval, contradicting interpolation.

Assume first that  $\delta_{n_k-1} = \delta_{n_k}$ . Then Lemma 3 along with the definitions of  $n_k$  and  $n_{k+1}$  directly imply that  $s_i^* = \delta_{n_k-1}$  for any  $i = n_k, \dots, n_{k+1} - 1$ . This then implies that the associated interpolator, i.e.  $f$  has no kink on  $(x_{n_k-1}, x_{n_{k+1}})$ .

Now assume that  $\delta_{n_k-1} \neq \delta_{n_k}$ . Without loss of generality, assume  $\delta_{n_k-1} < \delta_{n_k}$ . By the definition of Equation (9):

$$\delta_j > \delta_{j-1} \quad \text{for any } j \in \{n_k, \dots, n_{k+1} - 1\}.$$

Moreover, by definition of  $n_k$ , we have

$$\begin{cases} \text{either } n_k = 1 \\ \text{or } \delta_{n_k-1} \leq \delta_{n_k-2} \end{cases} \quad \text{and} \quad \begin{cases} \text{either } n_{k+1} = n \\ \text{or } \delta_{n_{k+1}} \leq \delta_{n_{k+1}-1} \end{cases}$$

Since  $n_{k+1} \leq n_k + 3$  by Assumption 1, Lemma 8 below states that for all the cases,  $f$  has exactly  $\left\lceil \frac{n_{k+1} - n_k}{2} \right\rceil$  kinks on  $(x_{n_k-1}, x_{n_{k+1}})$ .

Symmetric arguments hold if  $\delta_{n_k-1} > \delta_{n_k}$ . In conclusion,  $f$  has exactly  $\left\lceil \frac{n_{k+1} - n_k}{2} \right\rceil \mathbb{1}_{\delta_{n_k-1} \neq \delta_{n_k}}$  kinks on each  $(x_{n_k-1}, x_{n_{k+1}})$ . This implies that  $f$  has at most

$$\sum_{k \geq 1} \left\lceil \frac{n_{k+1} - n_k}{2} \right\rceil \mathbb{1}_{\delta_{n_k-1} \neq \delta_{n_k}}$$

kinks in total. This concludes the proof of Theorem 3, thanks to Lemma 4.

**Lemma 8.** For any  $k \geq 0$ , if  $\delta_{n_k-1} < \delta_{n_k}$ , then the minimiser of Equation (3)  $f$  has

1. 1 kink on  $(x_{n_k-1}, x_{n_{k+1}})$  if  $n_{k+1} = n_k + 1$ ;
2. 1 kink on  $(x_{n_k-1}, x_{n_{k+1}})$  if  $n_{k+1} = n_k + 2$ ;
3. 2 kinks on  $(x_{n_k-1}, x_{n_{k+1}})$  if  $n_{k+1} = n_k + 3$ .

Lemma 8 is written in this non-compact way since its proof shows separately (with similar arguments) the three cases.

*Proof.* 1) Consider  $n_{k+1} = n_k + 1$ . First assume that  $x_{n_k} \geq 0$ . Lemma 3 implies that  $s_{n_k+1}^* \in [\delta_{n_k+1}, \delta_{n_k}]$  and  $s_{n_k}^* \in [\delta_{n_k-1}, \delta_{n_k}]$ . In particular,  $s_{n_k}^* \leq \delta_{n_k}$ , which implies that  $s_{n_k+1}^* = \delta_{n_k}$ . Similarly,  $s_{n_k-1}^* \geq \delta_{n_k-1}$ , which implies that  $s_{n_k}^* = \delta_{n_k-1}$ . Using the mapping from Lemma 6, both values  $s_{n_k}^*$  and  $s_{n_k+1}^*$  yield that the associated function  $f$  has exactly one kink on  $(x_{n_k-1}, x_{n_{k+1}})$ , which is located at  $x_{n_k}$ . Similar arguments hold if  $x_{n_k} < 0$ .

2) Consider now  $n_{k+1} = n_k + 2$ .

First assume that  $x_{n_k+2} < 0$ . Thanks to Lemma 3, we can show similarly to the case 1) that  $s_{n_k+1}^* = \delta_{n_k+1}$ .

Now assume that  $x_{n_k+2} \geq 0$ . Similarly to the case 1),  $s_{n_k+2}^* = \delta_{n_k+1}$ . The minimisation problem of the slopes becomes on  $s_{i+1}^*$  for  $i = n_k$ :

$$s_{i+1}^* = \operatorname{argmin}_{s \in \tilde{S}} g_{i+1}(s, s_i^*) + g_{i+2}(\delta_{i+1}, s),$$

where  $\tilde{S} = S_i(s_i^*)$  if  $x_{i+1} \geq 0$ , and  $\tilde{S} = \{\delta_{i+1}\}$  otherwise. Note that  $g_{i+1}(s, s_i^*)$  is  $\sqrt{1 + x_{i+1}^2}$ -

Lipschitz in its first argument, while  $g_{i+2}(\delta_{i+1}, s) = \sqrt{1 + x_{i+1}^2} |s - \delta_{i+1}|$ . Moreover,  $s_{n_k}^* \in [\delta_{n_k-1}, \delta_{n_k}]$ . As a consequence, either  $x_{n_k+1} \geq 0$  and  $s_{n_k}^* = \delta_{n_k} = s_{n_k+1}^*$ ; or  $s_{n_k+1}^* = \delta_{n_k+1}$ .

Symmetrically, when reasoning on the points  $x_{n_k-1}, x_{n_k}$ :

- either  $s_{n_k}^* = \delta_{n_k-1}$ ;
- or  $(x_{n_k} < 0$  and  $s_{n_k}^* = \delta_{n_k} = s_{n_k+1}^*)$ .

There are thus two possible cases in the end:

- either  $(s_{n_k}^* = \delta_{n_k-1} \text{ and } s_{n_k+1}^* = \delta_{n_k+1})$ ;
- or  $(s_{n_k}^* = \delta_{n_k} = s_{n_k+1}^* \text{ and } x_{n_k} < 0 \leq x_{n_k+1})$ .

In the case where  $x_{n_k} < 0 \leq x_{n_k+1}$ , we also have  $s_{n_k-1}^* = \delta_{n_k-1}$  and  $s_{n_k+2}^* = \delta_{n_k+1}$ . A straightforward computation then yields a smaller cost on the functions  $g_i$  for the choice of slopes  $s_{n_k}^* = \delta_{n_k-1}$  and  $s_{n_k+1}^* = \delta_{n_k+1}$ .

As a consequence,  $s_{n_k}^* = \delta_{n_k-1}$  and  $s_{n_k+1}^* = \delta_{n_k+1}$  in any case. The mapping of Lemma 6 then yields that  $f$  has exactly one kink on  $(x_{n_k-1}, x_{n_k+2})$ , which is located in  $(x_{n_k}, x_{n_k+1})$ . Indeed, we either have  $a_{n_k-1} = 0$  or  $\tau_{n_k-1} = x_{n_k-1}$ ; similarly either  $a_{n_k+1} = 0$  or  $\tau_{n_k+1} = x_{n_k+2}$ .

3) Consider now  $n_{k+1} = n_k + 3$ . Similarly to the case 2), we have both

$$\begin{cases} \text{either } s_{n_k+2}^* = \delta_{n_k+2} \\ \text{or } (s_{n_k+1}^* = \delta_{n_k+1} = s_{n_k+2}^* \text{ and } x_{n_k+2}^* \geq 0) \end{cases}$$

$$\text{and } \begin{cases} \text{either } s_{n_k}^* = \delta_{n_k-1} \\ \text{or } (s_{n_k}^* = \delta_{n_k} = s_{n_k+1}^* \text{ and } x_{n_k} < 0). \end{cases}$$

When considering all the possible cases, the mapping of Lemma 6 implies that  $f$  has exactly two kinks on  $(x_{n_k-1}, x_{n_k+3})$ , which are located in  $[x_{n_k}, x_{n_k+2}]$ .  $\square$

## E.5 Adapted analysis for the case $x_1 \geq 0$

This section explains how to adapt the analysis of this section to the easier case where all  $x$  are positive. Lemma 7 holds under the exact same terms (but its second part is useless) in that case. From there, the proof of Theorem 2 consists in just showing the uniqueness of the minimisation problems for any  $\tilde{s} \in \mathcal{S}$ :

$$\min_{s_{i_0} \in \mathbb{R}} c_{i_0}(s_{i_0})$$

$$\min_{s_{i+1} \in \mathcal{S}_i(\tilde{s}_i)} g_{i+1}(s_{i+1}, \tilde{s}_i) + c_{i+1}(s_{i+1}) \quad \text{for any } i \in \{i_0, \dots, n-1\}.$$

The unique solution of the first problem is  $\delta_{i_0}$  thanks to Lemma 7, while same arguments as in Appendix E.1 hold for the second problem.

For the proof of Lemma 3, the exact same arguments as in Appendix E.2 hold for any  $i \geq i_0 + 1$ . For  $i = i_0 = 1$ , it is obvious in that case that  $s_1^* = \delta_1$ , leading to Lemma 3.

Finally, the proof of Theorem 3 follows the same lines when  $x_1 \geq 0$ .

## E.6 Proof of Corollary 1

**Remark 5.** Unfortunately, it does not seem possible to directly derive the uniqueness result of Corollary 1 from Theorem 3. We thus restate below the corrected version of Corollary 1, which states that all max-margin classifiers are among the sparsest margin classifiers, without uniqueness consideration. We believe that uniqueness can still be proven with a thorough analysis, using an adapted dynamic programming reformulation. The uniqueness property is yet of minor interest. We thus prefer to focus on a direct corollary of Theorem 3, given below.

**Corollary 1** (corrected).

$$\operatorname{argmin}_f \bar{R}_1(f) \subset \operatorname{argmin}_f \|f''\|_0.$$

$$\forall i \in [n], y_i f(x_i) \geq 1 \quad \forall i \in [n], y_i f(x_i) \geq 1$$

*Proof of Corollary 1 (corrected).* For classification, the natural partition to define is the following:

$$\begin{aligned} n_1 &= 1 \text{ and for any } k \geq 0 \text{ such that } n_k < n+1, \\ n_{k+1} &= \min \{j \in \{n_k+1, \dots, n\} \mid y_{n_k} \neq y_j\} \cup \{n+1\}. \end{aligned} \tag{34}$$

791 This partition splits the data so that for any  $k$ ,  $y_i$  has the same value for  $i \in \{n_k, n_{k+1} - 1\}$ . Denote  
 792  $K$  the number of  $n_k$  defined in Equation (34), i.e.,  $n_K = n + 1$ . From there, by simply noting that  
 793 any margin classifier has at least a kink in  $[x_{n_k}, x_{n_{k+1}})$  for  $k \in [K - 2]$ :

$$\min_f \quad \|f''\|_0 = K - 2.$$

$$\forall i \in [n], y_i f(x_i) \geq 1$$

794 Similarly to the proof of Lemma 1, we can first show the existence of a minimum.<sup>12</sup> Let us now  
 795 consider  $f$  a minimiser of

$$\min_f \quad \left\| \sqrt{1 + x^2} f'' \right\|_{\text{TV}}. \quad (35)$$

$$\forall i \in [n], y_i f(x_i) \geq 1$$

Define the set

$$S = \{n_k \mid k \in \{2, \dots, K - 1\}\} \cup \{n_k - 1 \mid k \in \{2, \dots, K - 1\}\}.$$

796 By continuity of  $f$ , we can choose an alternative training set  $(\tilde{x}_i, \tilde{y}_i)$  satisfying:

$$\begin{aligned} \tilde{x}_i &\in [x_{n_k - 1}, x_{n_k}] \quad \text{for any } i \in \{n_k - 1, n_k\}, \\ y_i &= f(\tilde{x}_i) \quad \text{for any } i \in S. \end{aligned}$$

797 Then, a direct application of Theorem 2 yields that the minimisation problem

$$\min_{\tilde{f}} \quad \left\| \sqrt{1 + x^2} \tilde{f}'' \right\|_{\text{TV}}, \quad (36)$$

$$\forall i \in S, y_i = \tilde{f}(\tilde{x}_i)$$

798 admits a unique minimiser, that we denote  $f_{\text{reg}}$ . But also note that this unique minimiser is also in  
 799 the constraint set of Equation (35) thanks to Lemma 3, so that

$$\left\| \sqrt{1 + x^2} f''_{\text{reg}} \right\|_{\text{TV}} \geq \left\| \sqrt{1 + x^2} f'' \right\|_{\text{TV}}.$$

800 However, since  $f$  is in the constraint set of Equation (36), we actually have an equality, and by unicity  
 801 of the minimiser of Equation (36),

$$f_{\text{reg}} = f.$$

802 Moreover, it is easy to check that Assumption 1 holds for the data  $(\tilde{x}_i, y_i)_{i \in S}$ , with  $n_{k+1} = n_k + 2$ .  
 803 As a consequence, Theorem 3 implies that the minimiser of Equation (36) is among the sparsest  
 804 interpolators for the set  $(\tilde{x}_i, y_i)_{i \in S}$ , i.e. it exactly counts  $K - 2$  kinks. This then implies that  
 805  $\|f''\|_0 = K - 2$ , so that

$$\operatorname{argmin}_f \bar{R}_1(f) \subset \operatorname{argmin}_f \|f''\|_0. \quad (37)$$

$$\forall i \in [n], y_i f(x_i) \geq 1 \quad \forall i \in [n], y_i f(x_i) \geq 1$$

806

□

<sup>12</sup>Proving that the sequence  $(a_j, b_j)$  is bounded is here a bit more tricky. Either the data is linearly separable, in which case the minimum is 0, or the data is not linearly separable. When the data is not linearly separable, then  $(a_j, b_j)$  is necessarily bounded, since  $(\mu_j, a_j, b_j)$  would behave as a linear classifier for arbitrarily large  $(a_j, b_j)$ .
